# Supplementary material
Source: PubMed Central journal article supplement (PMC5893371)
Supplement: NIHMS941150-supplement-1.pdf [file NIHMS941150-supplement-1.pdf]

1 **Supplementary Information**

2 **Supplementary Figure 1 Binding specificity, *in vitro* inhibitory function and epitope**  
3 **mapping of PfCSP mAbs.**

4 **a**, Binding of varying concentrations of PfCSP mAbs isolated from plasmablasts to rPfCSP by  
5 ELISA. **b**, Effect of PfCSP mAbs on primary hepatocyte infection by PfSPZ *in vitro*. Infection  
6 rate was determined by enumeration of liver-stage parasites or exoerythrocytic forms (EEF)  
7 present at day 3.5 post infection and normalized by expressing as a fraction of untreated controls.  
8 Antibody concentrations are as shown, (bars represent mean EEF Fraction +/- one standard  
9 deviation). **c**, Binding specificity of PfCSP mAbs to rPfCSP, N-, Repeat, or C-terminal domains  
10 of PfCSP by ELISA. Controls: 2A10, a mouse anti-PfCSP repeat mAb, and 5D5, a mouse  
11 PfCSP N-terminus specific mAb. **d and e**, Binding of mAbs to overlapping peptides spanning  
12 the repeat region (residues 97-276) of PfCSP with specified sequences numbered 20 – 61.  
13 Peptides 28-41, which consist only of NANP repeats, are represented by peptide 29. **f and g**,  
14 Binding of PfCSP mAbs to rPfCSP in the presence of varying concentrations of peptides.  
15 Peptide color code as in **d**. Data are representative of two (**b, c**) or three (**a, d-g**) independent  
16 experiments.

17

18 **Supplementary Figure 2 Apparent affinity of PfCSP mAbs by biolayer interferometry.**

19 Avidity of PfCSP mAbs to: **a**, rPfCSP; **b**, Peptide 21; **c**, Peptide 29. Antibody binding curves  
20 are shown in black (raw data). Data were fitted (dotted red lines) with the binding equations  
21 describing a 1:1 heterologous ligand interaction. mAb serial concentrations used are displayed  
22 on the panels of mAb CIS34. (n = 2, representative experiment is shown).

23

24 **Supplementary Figure 3 ITC analysis of PfCSP mAbs.**

25 Binding of PfCSP mAbs to rPfCSP or peptides. **a**, CIS23, CIS34, CIS42, mAb10. **b**, Binding  
26 of mAb CIS43 to peptides 21 and 29. **c**, Binding of mAb10 to PfCSP mutant (PfCSP-  
27 P102A/D103N). Changes in the junctional epitope is depicted in red and highlighted in yellow.  
28 Upper panels show the output signal,  $dQ/dt$ , as a function of time. Lower panels show the  
29 integrated heats as a function of the antibody-site/rPfCSP molar ratio in the cell. The solid line  
30 represents the result from best non-linear least-squares fit of the data to a binding model that  
31 takes into account one or two sets of sites with different affinities. Dissociation constant ( $K_d$ ),  
32 changes in Gibbs energy ( $\Delta G$ ) of binding, enthalpy ( $\Delta H$ ) and entropy ( $-T\Delta S$ ) and stoichiometry  
33 ( $N$ ) are shown. Data are representative of two independent experiments (**a-c**).

34

35 **Supplementary Figure 4 Crystal structures of CIS43 Fab in complex with PfCSP peptides**  
36 **and structural explanation for peptide 21 scanning mutagenesis.**

37 **a**, Surface representation of CIS43 Fab (light chain in wheat and heavy chain in light blue) with  
38 peptide 20, 21, 25, and 29 shown in sticks and colored as indicated. **b**, Surface representation of  
39 CIS43 Fab with 2Fo-Fc map shown at  $1\sigma$  around peptide 21, with peptide removed for  
40 visualization, with hydrophobic residues (glycine, alanine, valine, leucine, isoleucine, proline,  
41 phenylalanine, methionine, and tryptophan) shown in orange and electrostatics. **c**, Ranking and  
42 structural explanation of peptide 21 alanine variants based on competition results from Fig. 3c.  
43 **d**, Structural visualization of the mutations. X indicates loss of hydrogen bonding when mutating  
44 the residue.

45

46 **Supplementary Figure 5 Binding specificity and functional capacity of mAb CIS43 variant.**

47 **a**, Amino acid sequence alignment of mAb CIS43 and mAb CIS43 variant (CIS43v) heavy chain  
48 variable regions. Mutations are shown in red. **b**, Binding of varying concentrations of mAb  
49 CIS43 (solid lines) and mAb CIS43 variant (dashed lines) to peptide 21 (magenta) and to rPfCSP  
50 (grey) by ELISA. Data are representative of two independent experiments. **c**, Binding free-  
51 energy changes ( $\Delta\Delta G$ ) of CIS43 variant Fab to peptide 21 were calculated for each individual  
52 mutation as well as for the four combined mutations. **d**, Effect of mAb CIS43 variant on primary  
53 human hepatocyte infection by PfSPZ *in vitro*. Infection rate was determined as described in Fig.  
54 2. Bars represent mean EEF +/- one standard deviation. Data are from one experiment for  
55 CIS43v (**d**).

56

57 **Supplementary Figure 6 Crystal structures of CIS42 Fab in complex with PfCSP peptides.**

58 **a**, Surface representation of CIS42 Fab (light chain in wheat and heavy chain in light green) with  
59 peptide 21 in magenta sticks representation and 90° rotation with view down towards the  
60 combining sites. Top row, surface representation of CIS42 Fab with peptides shown as sticks:  
61 peptide 21 (magenta), peptide 20 (green), peptide 25 (yellow) and peptide 29 (cyan). Bottom  
62 row, surface representation of CIS42 Fab with 2Fo-Fc electron density map shown at  $1\sigma$  around  
63 peptide 21, with peptide removed for visualization, with hydrophobic residues (glycine, alanine,  
64 valine, leucine, isoleucine, proline, phenylalanine, methionine, and tryptophan) shown in orange  
65 and electrostatics. **b**, (Left) Details of the interactions of CIS42 Fab with the peptides. Antibody  
66 residues within 5 Å of the peptides are shown as sticks for the light (wheat) and heavy (light  
67 green) chains when bound to peptide 21, and as green, yellow and cyan for peptides 20, 25 and  
68 29, respectively. (Right) Superposition of the peptides shown as sticks and colored as in **a** with  
69 sequences observed in electron density. **c**, Details of the interactions between peptide 21 and

70 CIS42 Fab. Peptide 21 is shown in magenta as sticks representation. The CIS42 epitope is  
71 shown as sticks and semi-transparent surface with the residues colored based on the CDR regions  
72 for light chain in shades of wheat and for heavy chain in shades of green. **d**, Sequence of CIS42  
73 Fab following Kabat numbering with residues that contact each peptide shown as open star for  
74 side chains only, closed circle for main chain only and closed star for both main and side chains,  
75 colored under the sequences as in **a**. **e**, Sticks representation of peptide 21 (magenta) in the  
76 conformation bound to CIS42 Fab with superposition of three type-I  $\beta$ -turn NPNA repeat  
77 structures of PfCSP as described in Ghasparian et al.<sup>28</sup>. Each NPNA repeat is labeled and shown  
78 in different colors for clarity. RMSD in Å is indicated over the total number of atoms used in the  
79 alignment.

80

### 81 **Supplementary Figure 7 Structural comparison of peptide 21 bound to CIS43 and CIS42**

82 **Fabs. a**, (Left) Side-by-side structural comparison of peptide 21 which adopts a different  
83 conformation when bound to CIS43 Fab (magenta) or CIS42 Fab (light pink) (residues do not  
84 align). (Right) 90° rotation showing the antibodies in transparent surface underlining a different  
85 angle of approach when binding to the peptide. **b**, Peptide 21 (magenta when bound to CIS43  
86 Fab and light pink when bound to CIS42 Fab) aligned on the core NPN residues (residues 107-  
87 109) repeat region and angle of approach of the antibodies.

88

### 89 **Supplementary Figure 8 Molecular Dynamics (MD) Simulations.**

90 **a**, RMSD for CIS43 Fab bound to peptide 21 over 500 nanoseconds (ns) of MD. CIS43 Fab  
91 heavy and light chain were used to align the trajectories. CIS43 Fab is depicted in indigo; full  
92 peptide 21 (residues 101-111) is depicted in plum; residues 107-109 in grape; and residues 101-

93 103 in lavender. **b**, RMSD of CIS42 Fab bound to peptide 21 over 500 ns of MD, calculated the  
94 same as in **a**. CIS42 Fab is depicted in dark green; full peptide 21 (residues 101-113) is depicted  
95 in forest green; residues 107-109 in mint; and residues 101-103 in lime. **c**, RMSF of 500 ns of  
96 free peptide 21 beginning from its CIS43 Fab conformation (depicted in magenta circles and a  
97 solid line) and RMSF of free peptide 21 beginning from its CIS42 Fab conformation (depicted in  
98 magenta squares with a dotted line). **d**, CIS43 and CIS42 Fab crystal structures aligned to their  
99 500 ns frames respectively. Color key for CIS43 Fab: crystal heavy chain shown in purple and  
100 crystal light chain shown in gold; 500 ns heavy chain shown in lavender and 500 ns light chain  
101 shown in khaki. Color key for CIS42 fab: crystal heavy chain shown in dark green and crystal  
102 light chain shown in sandy brown; 500 ns heavy chain shown in bright green and 500 ns light  
103 chain shown in yellow. **e**, Hydrogen bonding analysis of peptide 21 in complex with CIS42 and  
104 CIS43 Fabs over 500ns compared to the respective crystal structures. Hydrogen bonds were  
105 calculated between peptide residues and the Fab binding interface. Numbers in parentheses  
106 indicate bonds present in the crystal structure. **f**, Principal component analysis (PCA) of 500 ns  
107 of free peptide 21 colored by the number of times specific conformations occur. PC1 is plotted  
108 on the x-axis and PC2 is plotted on the y-axis. Crystal structures of peptide 21 in CIS42 and  
109 CIS43 Fab conformations are labeled with gray arrows. The top ten eigen values from the PCA  
110 analyses are listed in the table.  $n = 50,000$ .

111

## 112 **Supplementary Figure 9 Structural repeat motif analysis.**

113 Phi and Psi angles ( $^{\circ}$ ) for residues N/D, P, N and A/V of the repeat motif for **a**, PfCSP peptides  
114 bound to CIS43 Fab; **b**, PfCSP peptides bound to CIS42 Fab; **c**, Average plus/minus one  
115 standard deviation for **a** and **b**; and **d**, Crystal structure of NPNA determined by Ghasparian et

116 al.<sup>28</sup>. The alignment of the repeat motif peptide, based on the crystal structures as described in  
117 Fig. 4 and Supplementary Fig. 6, are shown as indicated. The NPN repeat motif occurrences are  
118 underlined under the sequences. Highlighted in red are the notable outliers for which Phi and/or  
119 Psi is 60° different compared to others in the same row. For peptides bound to CIS43 Fab, this  
120 difference is in the first A/V, leading to a repeating structure of NPNA-NPNA; for peptides  
121 bound to CIS42 Fab, this difference is with N2 (the Asn following the Pro), leading to a  
122 repeating structure of ANPN-ANPN. We note that the Phi, Psi angles for the 1<sup>st</sup> occurrence of  
123 the NPN repeat in peptide 29 bound to mAb CIS43 differs from the rest as shown in Fig. 4.

124

#### 125 **Supplementary Figure 10 Peptide 21 sequence conservation.**

126 **a**, Complete PfCSP sequence of NF54 strain (clone 3D7). Central repeat region (in black) is  
127 flanked by the N- (blue) and C- (green) terminal regions, the leader (grey) and GPI anchor  
128 (orange) sequences. Boxed in magenta is peptide 21 sequence which occurs at the junction of the  
129 N- and Repeat regions. RI sequence is in brown letters. **b**, Peptide 21 sequence variation among  
130 laboratory and field isolates. Each residue within NF54 peptide 21 sequence is depicted with its  
131 position on top. Non-synonymous single nucleotide polymorphisms (SNPs) or indels leading to  
132 amino acid coding changes are shown with their respective frequencies, and geographic  
133 locations. **c**, Pie chart representing frequencies of peptide 21 amino acid conservation shown in  
134 **b**<sup>34,35,70-73</sup>.

135

#### 136 **Supplementary Table 1 PfCSP Immunoglobulin V-gene family usage**

137

138 **Supplementary Table 2 Biolayer interferometry kinetics of PfCSP mAbs binding to**  
139 **rPfCSP, Peptide 21, or Peptide 29**

140

141 **Supplementary Table 3 Data collection and refinement statistics for CIS43 Fab**

142

143 **Supplementary Table 4 Details of the interactions of CIS43 Fab with peptides 20, 21, 25,**  
144 **and 29 (from Pisa web server)**

145

146 **Supplementary Table 5 Data collection and refinement statistics for CIS42 Fab**

147

148 **Supplementary Video 1: Molecular dynamics simulation of free peptide 21, 500ns**

149 Simulation of free peptide 21 beginning from its CIS43-bound conformation. Peptide residues  
150 101 – 111 are shown. Residues Asn<sub>107</sub>, Pro<sub>108</sub>, and Asn<sub>109</sub> are colored in a gray backbone. Carbon  
151 atoms are depicted in cyan, nitrogen atoms in blue, and oxygen atoms in red.

152

153 **Supplementary Video 2: Molecular dynamics simulation of peptide 21 bound to CIS43**  
154 **Fab, 500ns**

155 The CIS43 Fab heavy chain is shown in purple and the light chain is shown in yellow. Key  
156 residues on the Fab involved in hydrogen bonding are shown in ball-and-stick: four amino acids  
157 on the heavy chain (Ala<sub>33</sub>, Arg<sub>58</sub>, Leu<sub>95</sub>, and Leu<sub>98</sub>) and one on the light chain (Tyr<sub>92</sub>).

158 Peptide residues 101 – 111 are shown in pink. Residues Asn<sub>107</sub>, Pro<sub>108</sub>, and Asn<sub>109</sub>, which have  
159 been shown to be essential for binding, are colored in a gray backbone. Carbon atoms are  
160 depicted in cyan, nitrogen atoms in blue, and oxygen atoms in red.

161

162 **Supplementary Video 3: Molecular dynamics simulation of peptide 21 bound to CIS42**

163 **Fab, 500ns**

164 The CIS42 Fab heavy chain is shown in green and the light chain is shown in gold. Key residues

165 on the Fab involved in hydrogen bonding are shown in ball-and-stick: four amino acids on the

166 heavy chain (Thr<sub>31</sub>, Asn<sub>52</sub>, Tyr<sub>98</sub>, and Gly<sub>99</sub>) and one on the light chain (Ser<sub>27</sub>).

167 Peptide residues 101 – 111 are shown in pink. Residues Asn<sub>107</sub>, Pro<sub>108</sub>, and Asn<sub>109</sub>, which have

168 been shown to be essential for binding, are colored in a gray backbone. Carbon atoms are

169 depicted in cyan, nitrogen atoms in blue, and oxygen atoms in red.



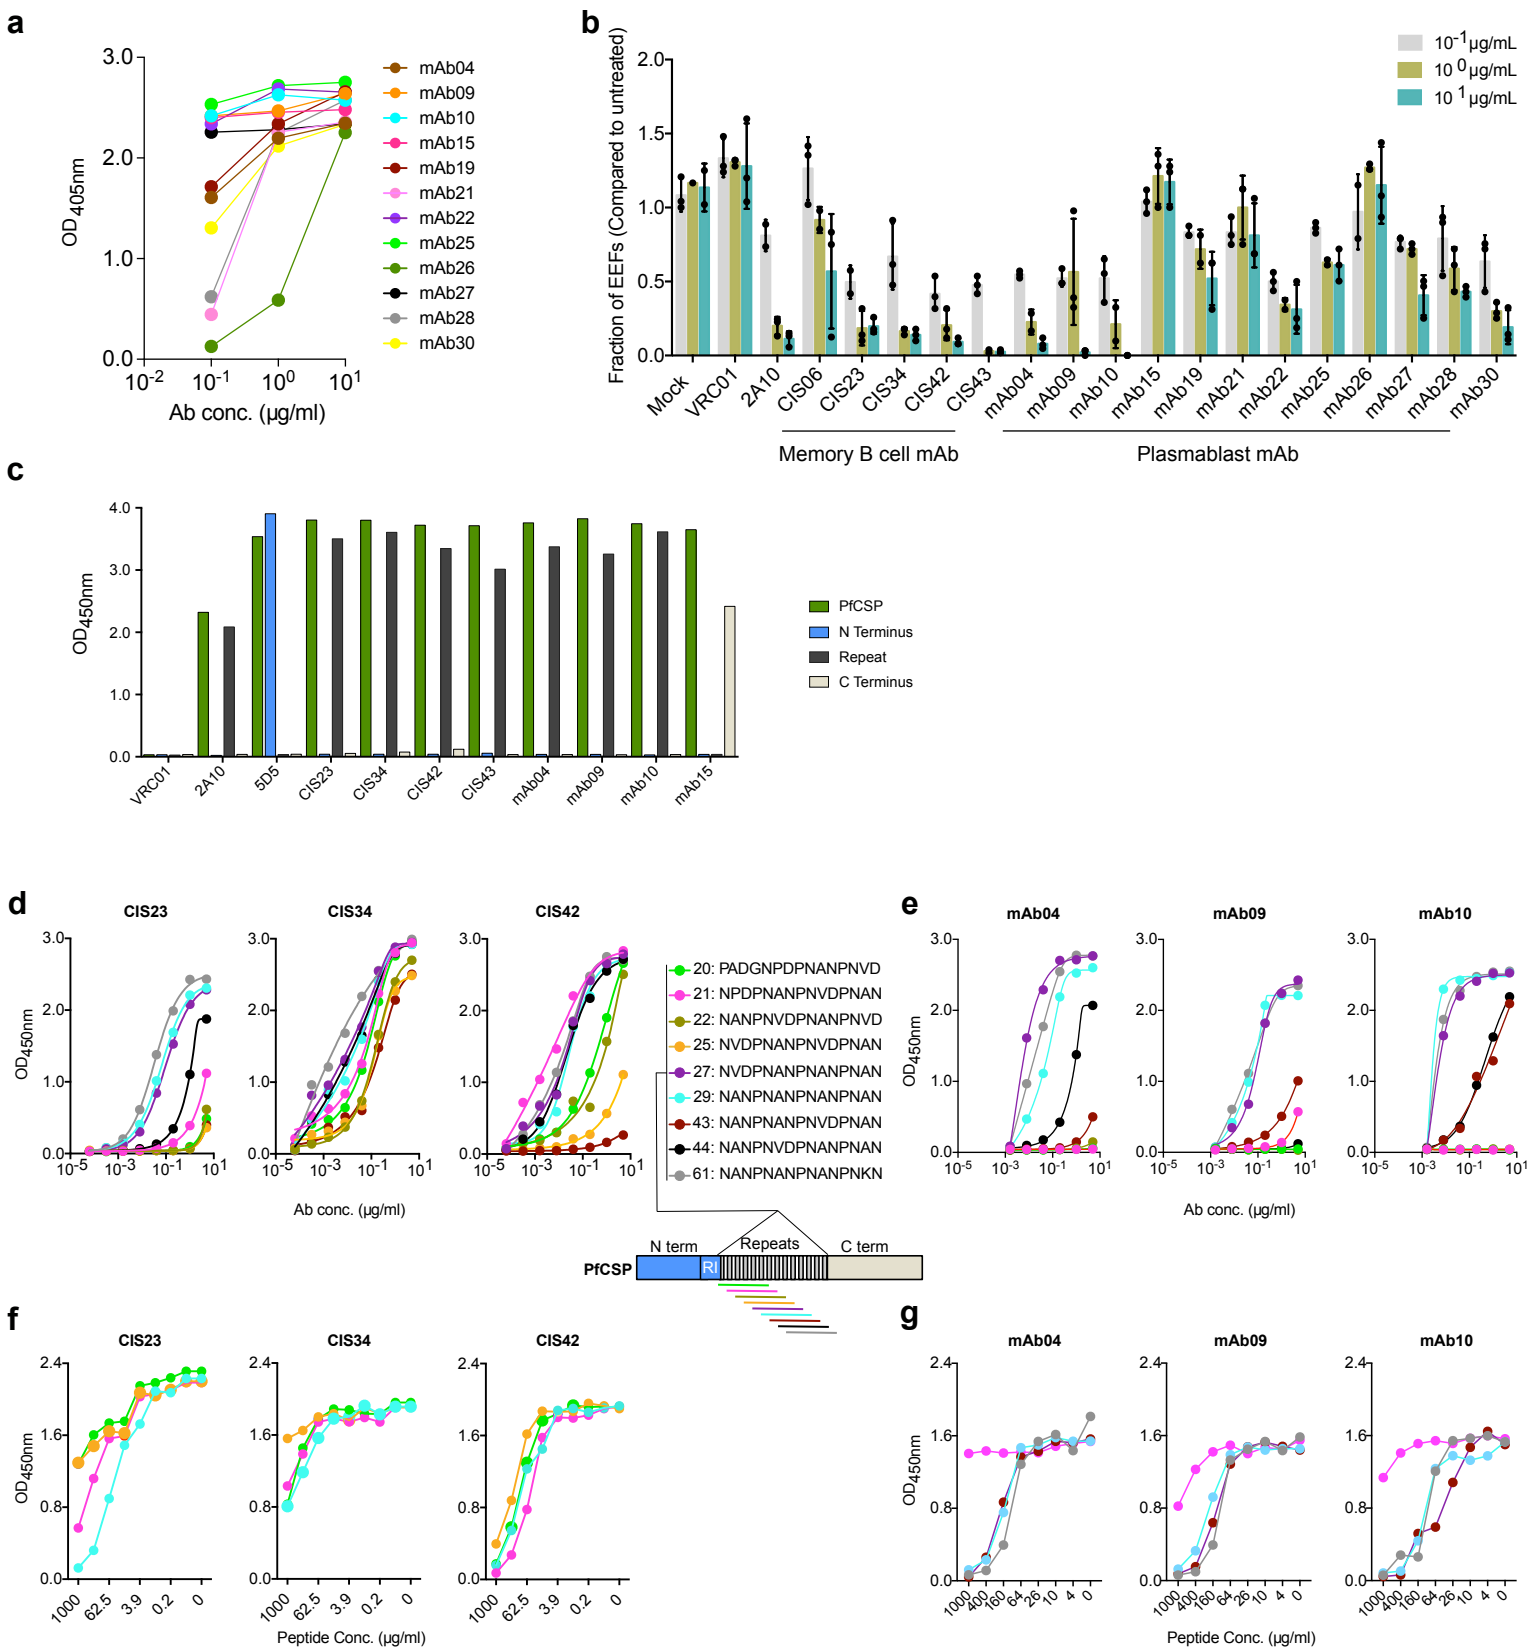

**Supplementary Figure 1 Binding specificity, *in vitro* inhibitory function and epitope mapping of PfCSP mAbs.**

**a**, Binding of varying concentrations of PfCSP mAbs isolated from plasmablasts to rPfCSP by ELISA. **b**, Effect of PfCSP mAbs on primary hepatocyte infection by PfSPZ *in vitro*. Infection rate was determined by enumeration of liver-stage parasites or exoerythrocytic forms (EEF) present at day 3.5 post infection and normalized by expressing as a fraction of untreated controls. Antibody concentrations are as shown, (bars represent mean EEF Fraction  $\pm$  one standard deviation). **c**, Binding specificity of PfCSP mAbs to rPfCSP, N-, Repeat, or C-terminal domains of PfCSP by ELISA. Controls: 2A10, a mouse anti-PfCSP repeat mAb, and 5D5, a mouse PfCSP N-terminus specific mAb. **d and e**, Binding of mAbs to overlapping peptides spanning the repeat region (residues 97-276) of PfCSP with specified sequences numbered 20 – 61. Peptides 28-41, which consist only of NANP repeats, are represented by peptide 29. **f and g**, Binding of PfCSP mAbs to rPfCSP in the presence of varying concentrations of peptides. Peptide color code as in **d**. Data are representative of two (**b, c**) or three (**a, d-g**) independent experiments.

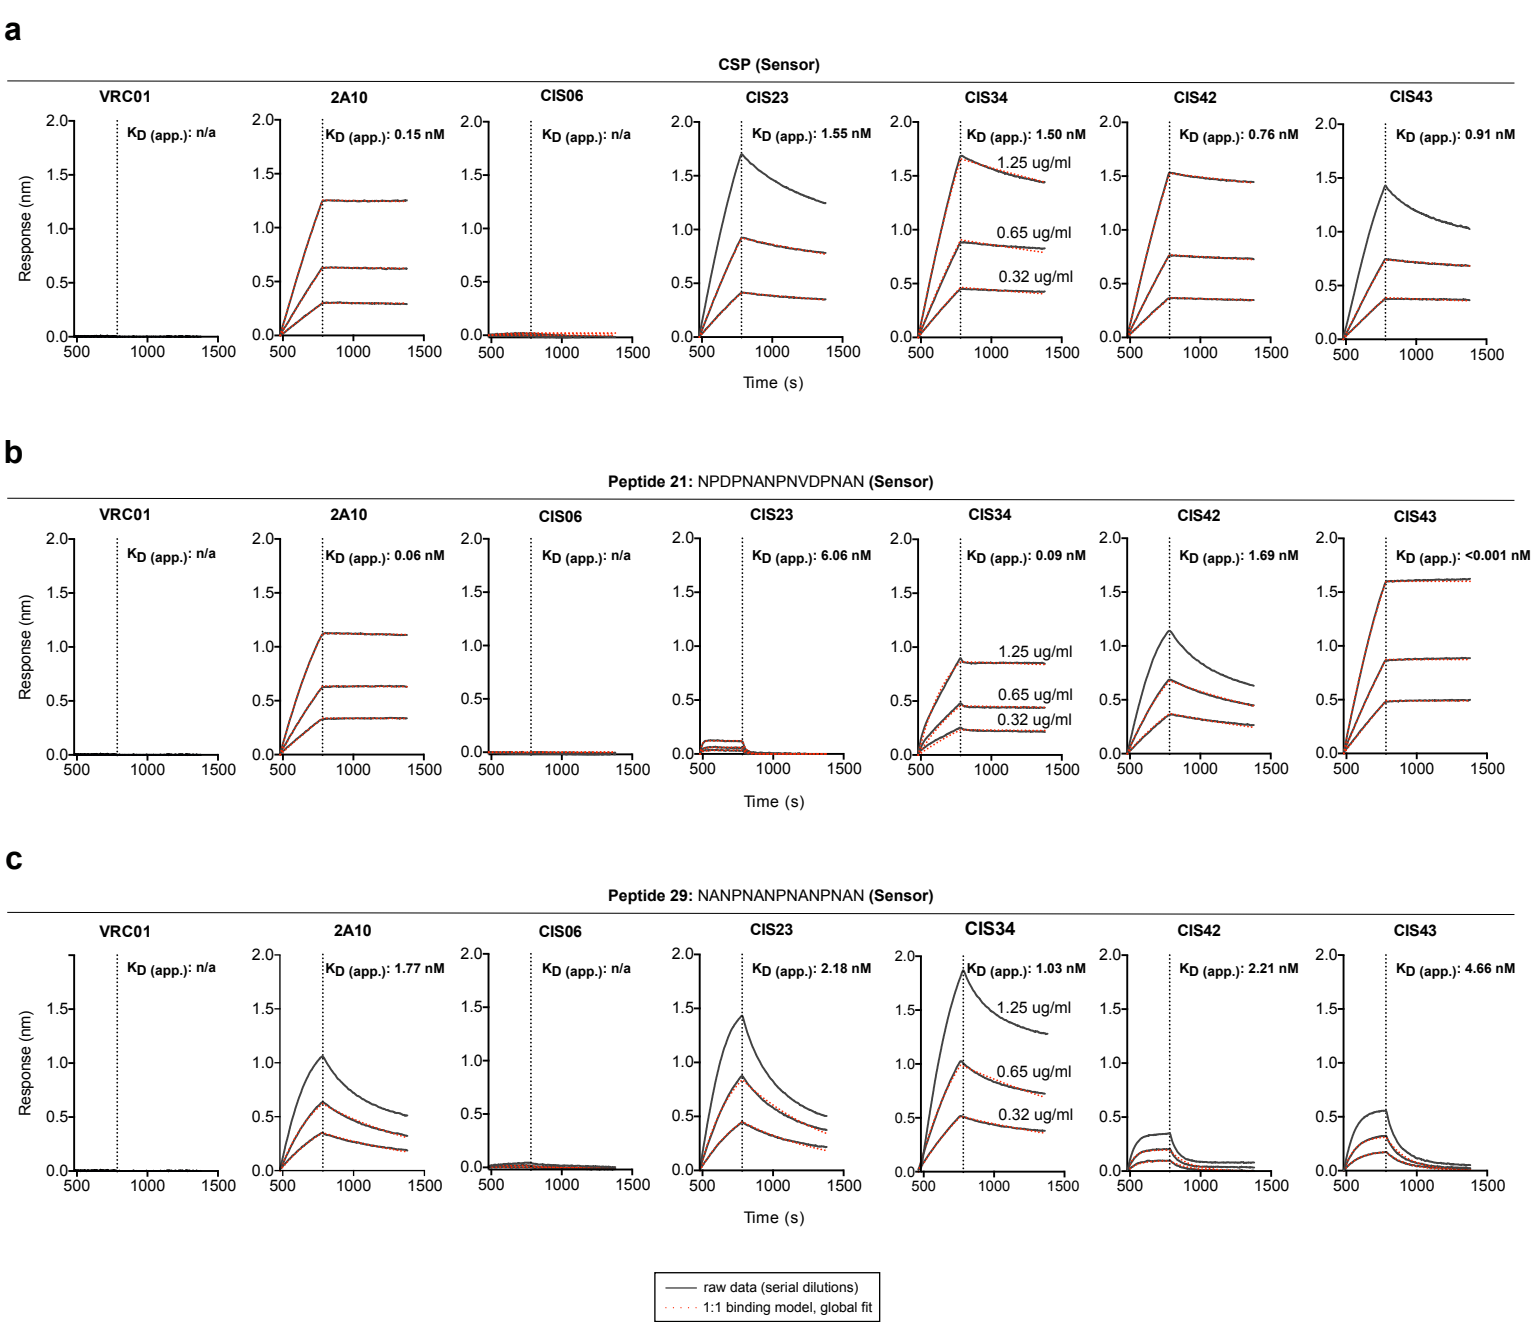

**Supplementary Figure 2 Apparent affinity of PfCSP mAbs by biolayer interferometry.**

Avidity of PfCSP mAbs to: **a**, rPfCSP; **b**, Peptide 21; **c**, Peptide 29. Antibody binding curves are shown in black (raw data).

Data were fitted (dotted red lines) with the binding equations describing a 1:1 heterologous ligand interaction. mAb serial concentrations used are displayed on the panels of mAb CIS34. (n = 2, representative experiment is shown).

PfCSP mAbs bound to rPfCSP

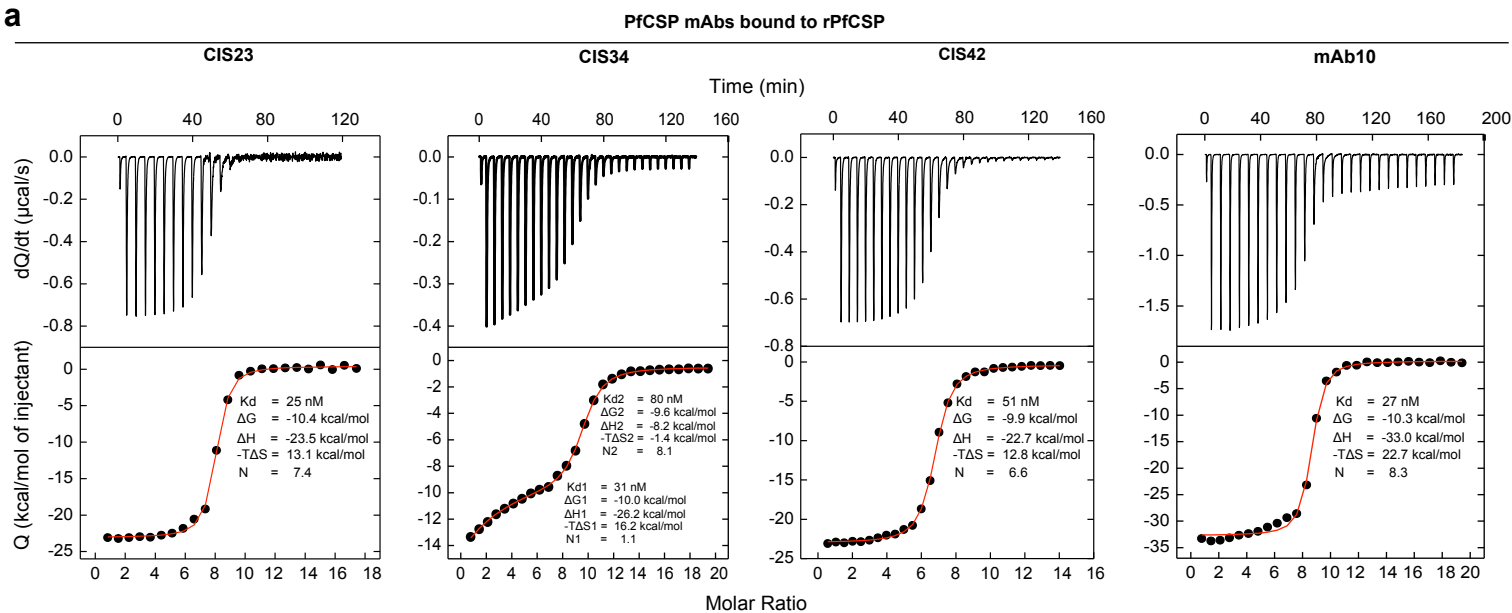

**b** mAb CIS43 bound to PfCSP peptides

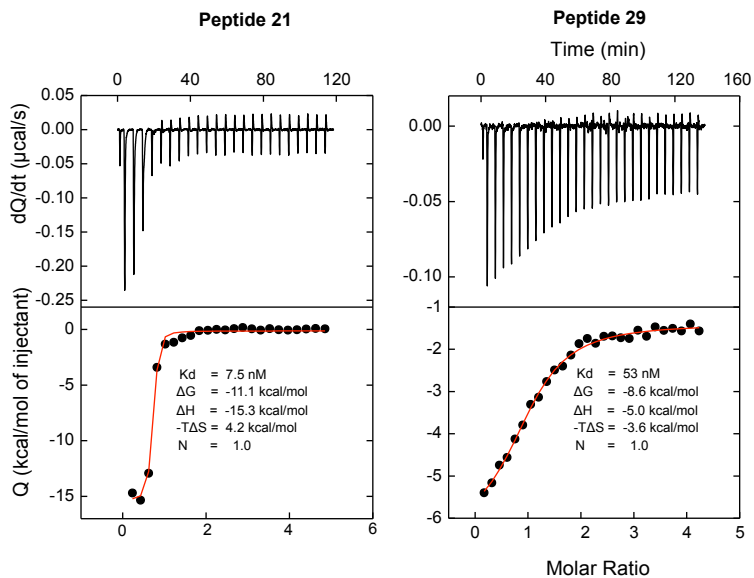

**c** PfCSP mAbs bound to PfCSP-P102A/D103N

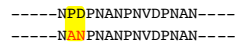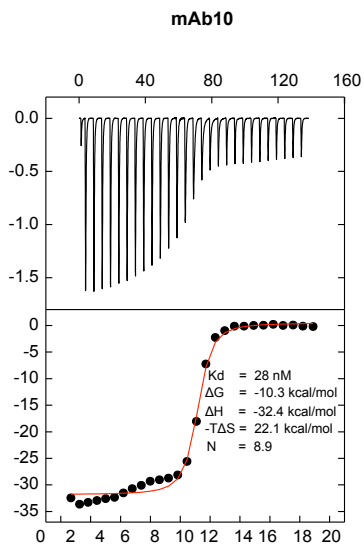

**Supplementary Figure 3 ITC analysis of PfCSP mAbs.**

Binding of PfCSP mAbs to rPfCSP or peptides. **a**, CIS23, CIS34, CIS42, mAb10. **b**, Binding of mAb CIS43 to peptides 21 and 29. **c**, Binding of mAb10 to PfCSP mutant (PfCSP-P102A/D103N). Changes in the junctional epitope is depicted in red and highlighted in yellow. Upper panels show the output signal,  $dQ/dt$ , as a function of time. Lower panels show the integrated heats as a function of the antibody-site/rPfCSP molar ratio in the cell. The solid line represents the result from best non-linear least-squares fit of the data to a binding model that takes into account one or two sets of sites with different affinities. Dissociation constant ( $K_d$ ), changes in Gibbs energy ( $\Delta G$ ) of binding, enthalpy ( $\Delta H$ ) and entropy ( $-\Delta S$ ) and stoichiometry ( $N$ ) are shown. Data are representative of two independent experiments (**a-c**).

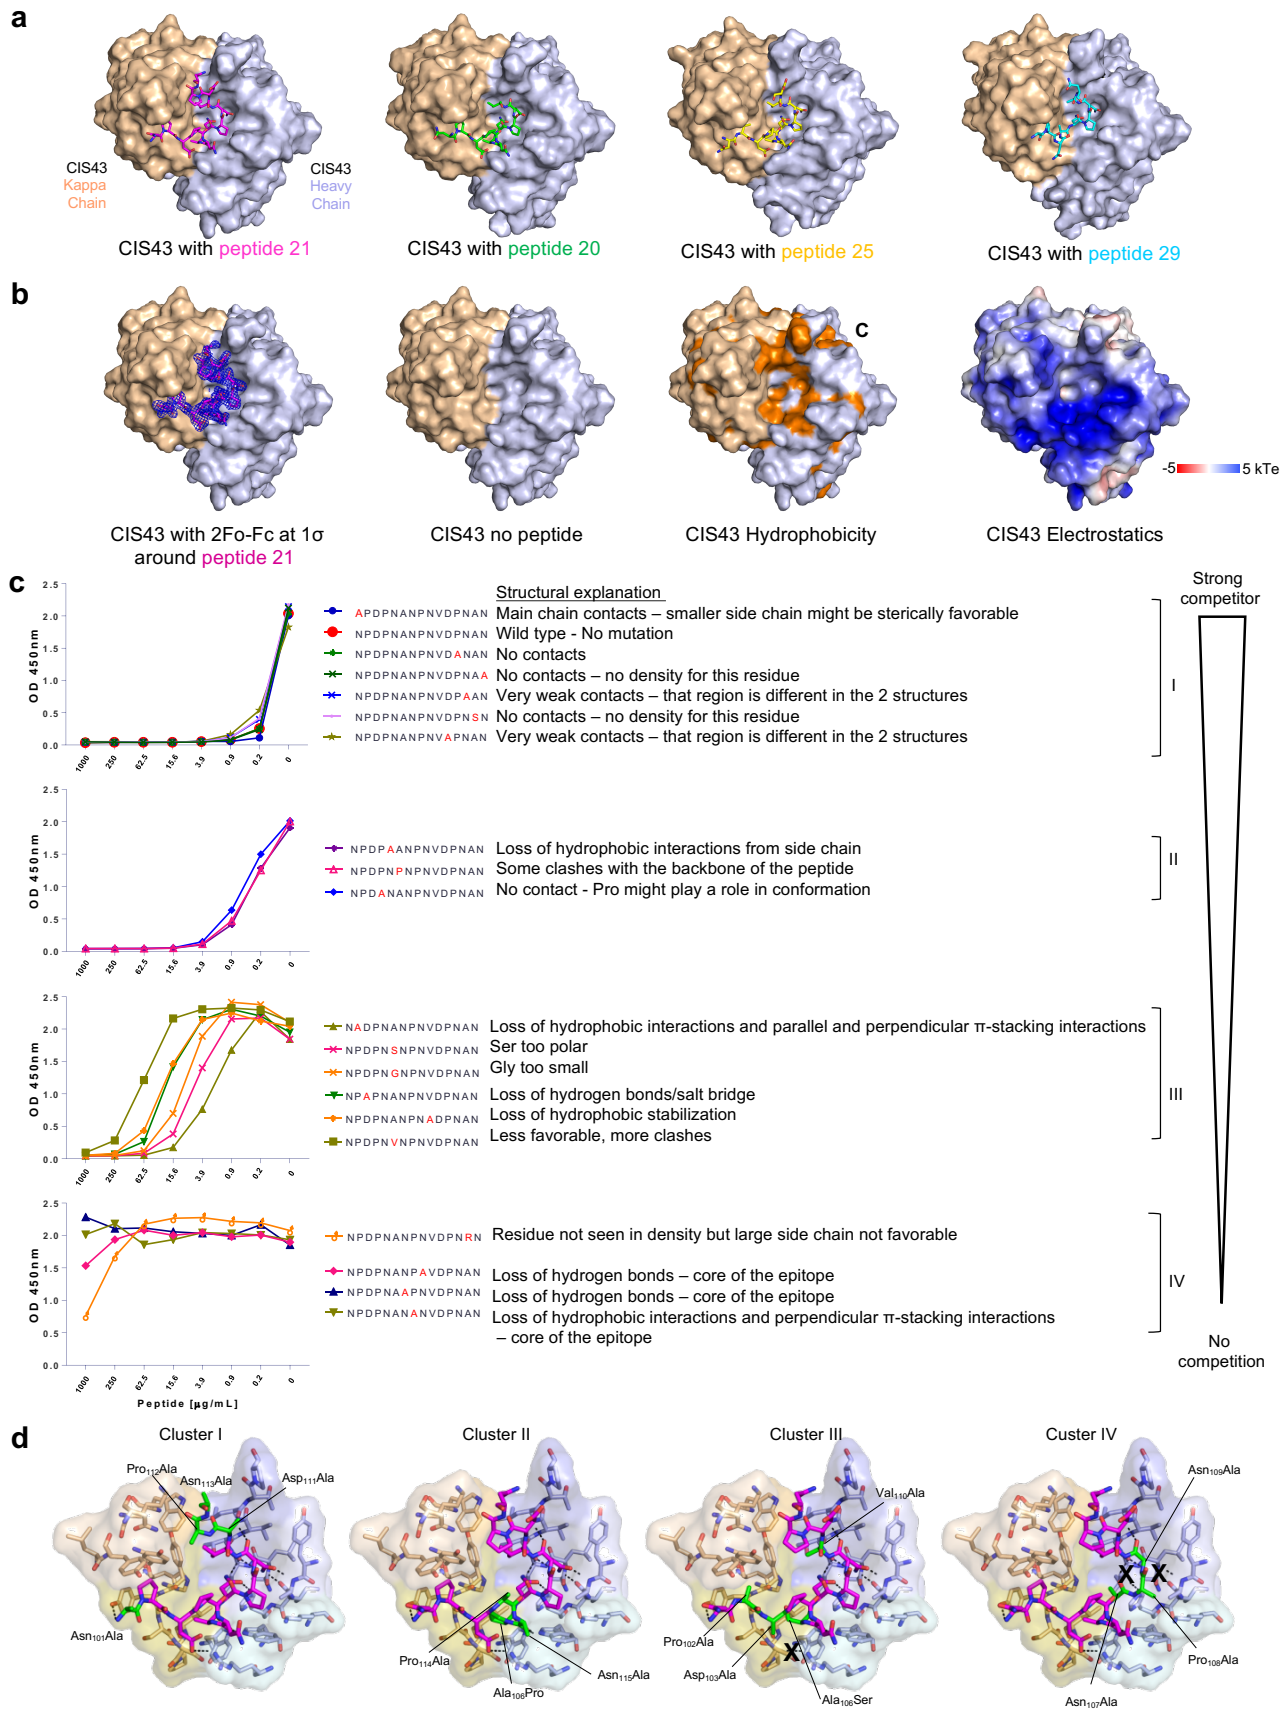

**Supplementary Figure 4 Crystal structures of CIS43 Fab in complex with PfCSP peptides and structural explanation for peptide 21 scanning mutagenesis.**

**a**, Surface representation of CIS43 Fab (light chain in wheat and heavy chain in light blue) with peptide 20, 21, 25, and 29 shown in sticks and colored as indicated. **b**, Surface representation of CIS43 Fab with 2Fo-Fc map shown at 1σ around peptide 21, with peptide removed for visualization, with hydrophobic residues (glycine, alanine, valine, leucine, isoleucine, proline, phenylalanine, methionine, and tryptophan) shown in orange and electrostatics. **c**, Ranking and structural explanation of peptide 21 alanine variants based on competition results from Fig. 3c. **d**, Structural visualization of the mutations. X indicates loss of hydrogen bonding when mutating the residue.

**a**

|        |       |                                                 |
|--------|-------|-------------------------------------------------|
| CIS43  | Heavy | QVQLVQSGAEVKKPGASVKV SCKA SGYT F TSY AIHWVRQA   |
| CIS43v | Heavy | QVQLVQSGAEVKKPGASVKV SCKA SGYT F TSY AIHWVRQA   |
| CIS43  | Heavy | PGQRLEWMGWIKAGNGNTRY SQKF QDRV T ITRDTST TTAY   |
| CIS43v | Heavy | PGQRLEWMGWIKAGNGGGGYSGKF QDRV T ITRDTST TTAY    |
| CIS43  | Heavy | MELSSLRSED TAVYYCALLT VLTP DDAF DIWG QGTMVTVS S |
| CIS43v | Heavy | MELSSLRSED TAVYYCALLT VLTP DDAF DIWG QGTMVTVS S |

**b**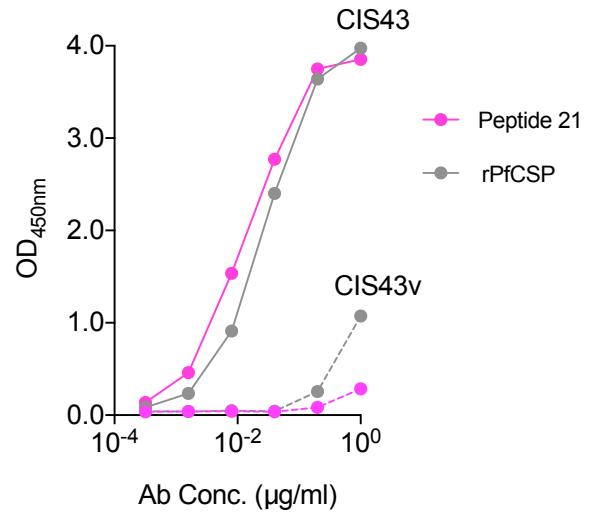**c**

| CIS43 variant          |                                                             |
|------------------------|-------------------------------------------------------------|
| Mutation               | Binding free-energy changes ( $\Delta\Delta G$ ) (kcal/mol) |
| N56G                   | -0.01                                                       |
| T57G                   | -0.01                                                       |
| R58G                   | 1.7                                                         |
| Q61G                   | 0                                                           |
| N56G, T57G, R58G, Q61G | 1.4                                                         |

**d**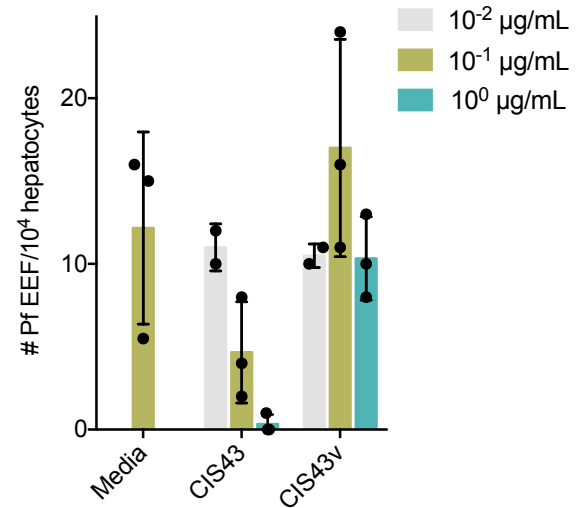

### Supplementary Figure 5 Binding specificity and functional capacity of mAb CIS43 variant.

**a**, Amino acid sequence alignment of mAb CIS43 and mAb CIS43 variant (CIS43v) heavy chain variable regions. Mutations are shown in red. **b**, Binding of varying concentrations of mAb CIS43 (solid lines) and mAb CIS43 variant (dashed lines) to peptide 21 (magenta) and to rPfCSP (grey) by ELISA. Data are representative of two independent experiments. **c**, Binding free-energy changes ( $\Delta\Delta G$ ) of CIS43 variant Fab to peptide 21 were calculated for each individual mutation as well as for the four combined mutations. **d**, Effect of mAb CIS43 variant on primary human hepatocyte infection by PfSPZ *in vitro*. Infection rate was determined as described in Fig. 2. Bars represent mean EEF  $\pm$  one standard deviation. Data are from one experiment for CIS43v in d.

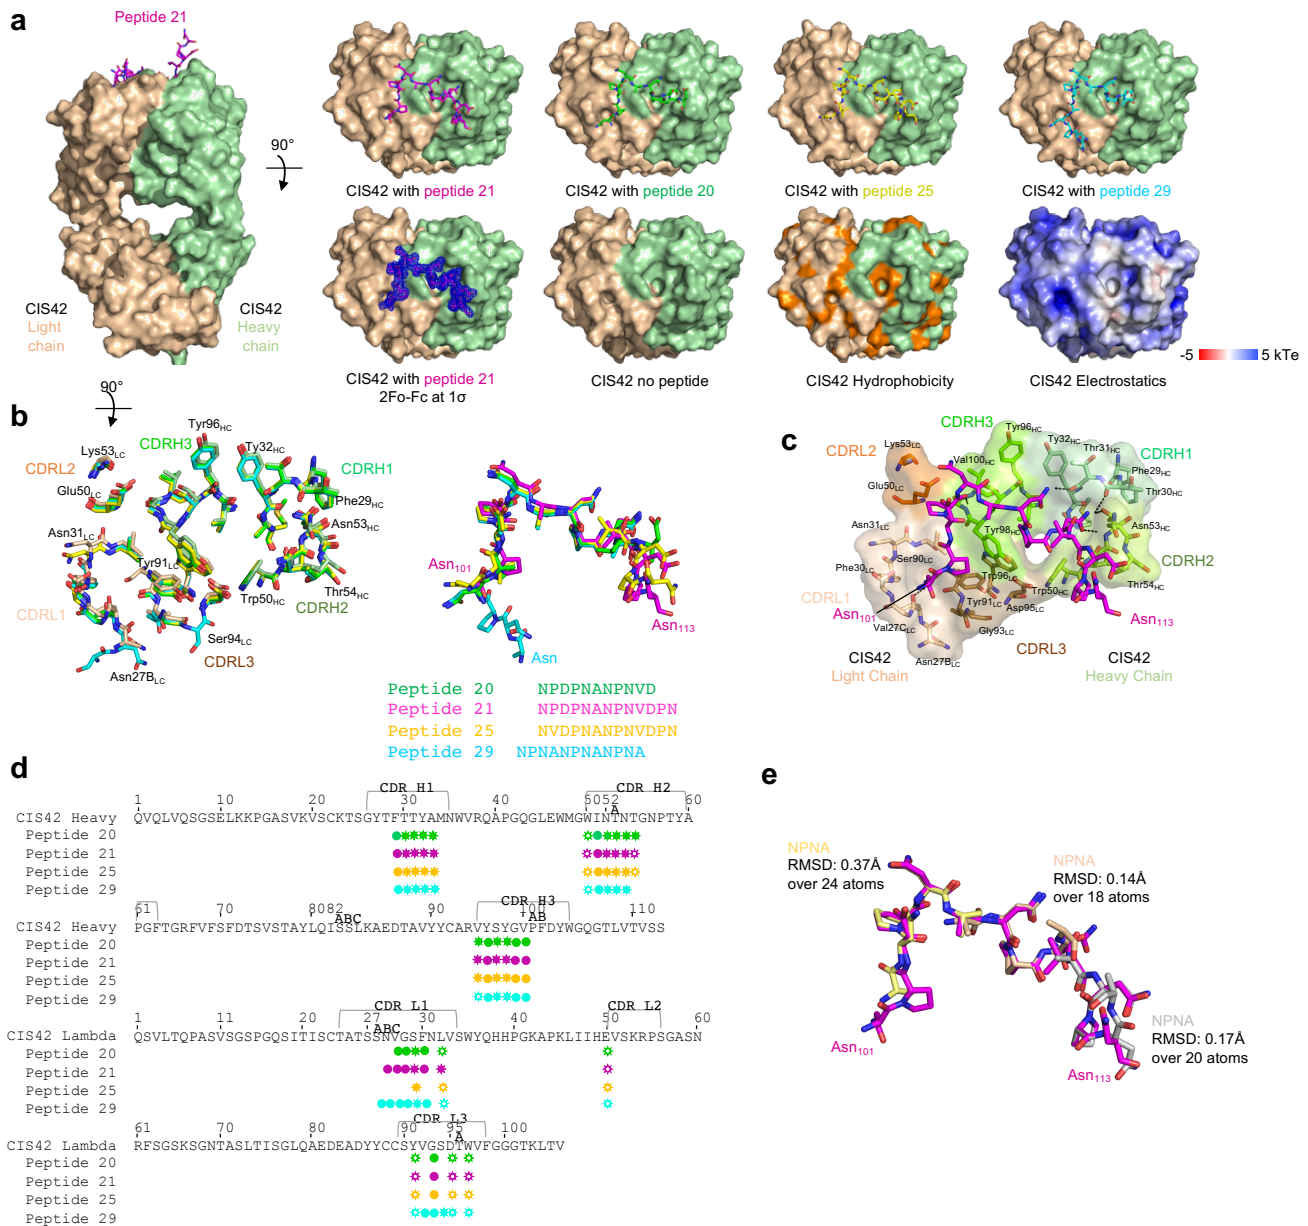

### Supplementary Figure 6 Crystal structures of CIS42 Fab in complex with PfCSP peptides.

**a**, Surface representation of CIS42 Fab (light chain in wheat and heavy chain in light green) with peptide 21 in magenta sticks representation and 90° rotation with view down towards the combining sites. Top row, surface representation of CIS42 Fab with peptides shown as sticks: peptide 21 (magenta), peptide 20 (green), peptide 25 (yellow) and peptide 29 (cyan). Bottom row, surface representation of CIS42 Fab with 2Fo-Fc electron density map shown at 1σ around peptide 21, with peptide removed for visualization, with hydrophobic residues (glycine, alanine, valine, leucine, isoleucine, proline, phenylalanine, methionine, and tryptophan) shown in orange and electrostatics.

**b**, (Left) Details of the interactions of CIS42 Fab with the peptides. Antibody residues within 5 Å of the peptides are shown as sticks for the light (wheat) and heavy (light green) chains when bound to peptide 21, and as green, yellow and cyan for peptides 20, 25 and 29, respectively. (Right) Superposition of the peptides shown as sticks and colored as in **a** with sequences observed in electron density.

**c**, Details of the interactions between peptide 21 and CIS42 Fab. Peptide 21 is shown in magenta as sticks representation. The CIS42 epitope is shown as sticks and semi-transparent surface with the residues colored based on the CDR regions for light chain in shades of wheat and for heavy chain in shades of green.

**d**, Sequence of CIS42 Fab following Kabat numbering with residues that contact each peptide shown as open star for side chains only, closed circle for main chain only and closed star for both main and side chains, colored under the sequences as in **a**.

**e**, Sticks representation of peptide 21 (magenta) in the conformation bound to CIS42 Fab with superposition of three type-I β-turn NPNA repeat structures of PfCSP as described in Ghasparian et al.<sup>28</sup>. Each NPNA repeat is labeled and shown in different colors for clarity. RMSD in Å is indicated over the total number of atoms used in the alignment.

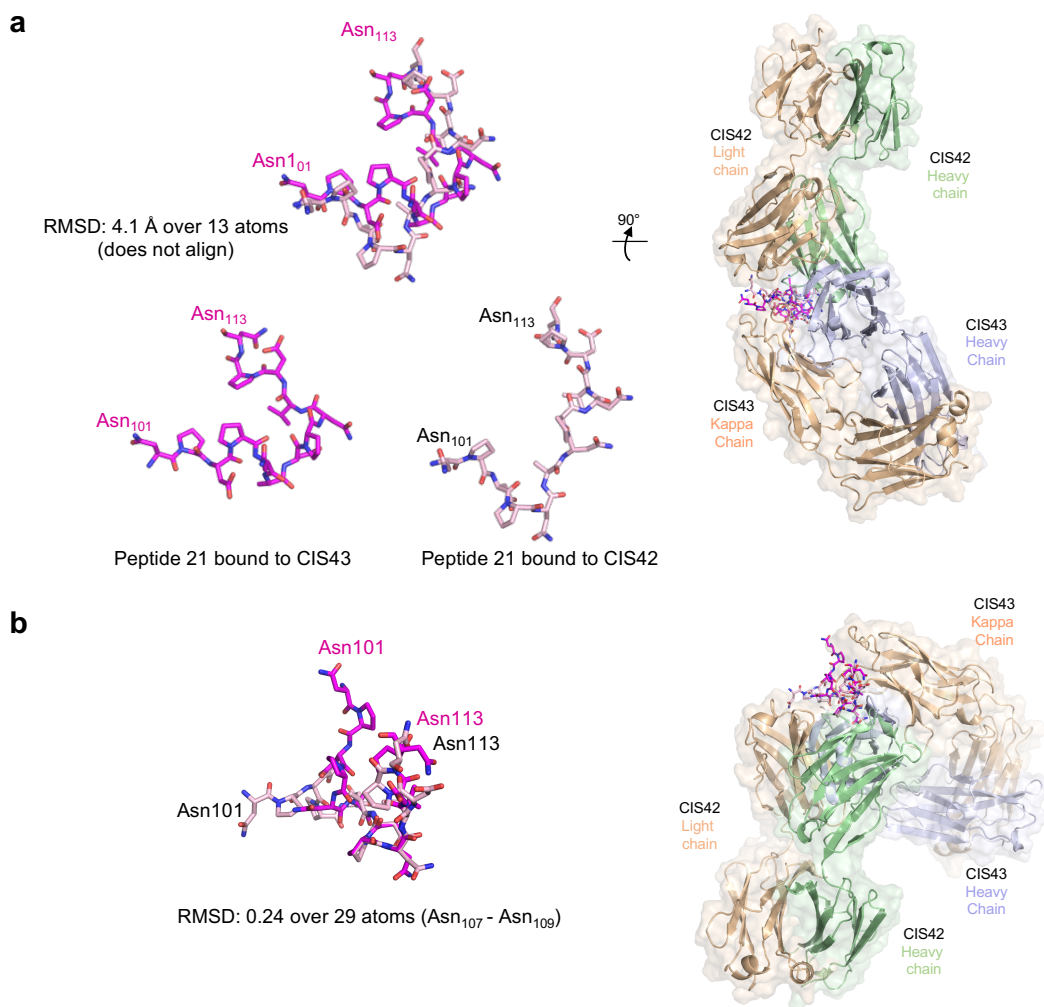

**Supplementary Figure 7 Structural comparison of peptide 21 bound to CIS43 and CIS42 Fabs.** **a**, (Left) Side-by-side structural comparison of peptide 21 which adopts a different conformation when bound to CIS43 Fab (magenta) or CIS42 Fab (light pink) (residues do not align). (Right) 90° rotation showing the antibodies in transparent surface underlining a different angle of approach when binding to the peptide. **b**, Peptide 21 (magenta when bound to CIS43 Fab and light pink when bound to CIS42 Fab) aligned on the core NPN residues (residues 107-109) repeat region and angle of approach of the antibodies.

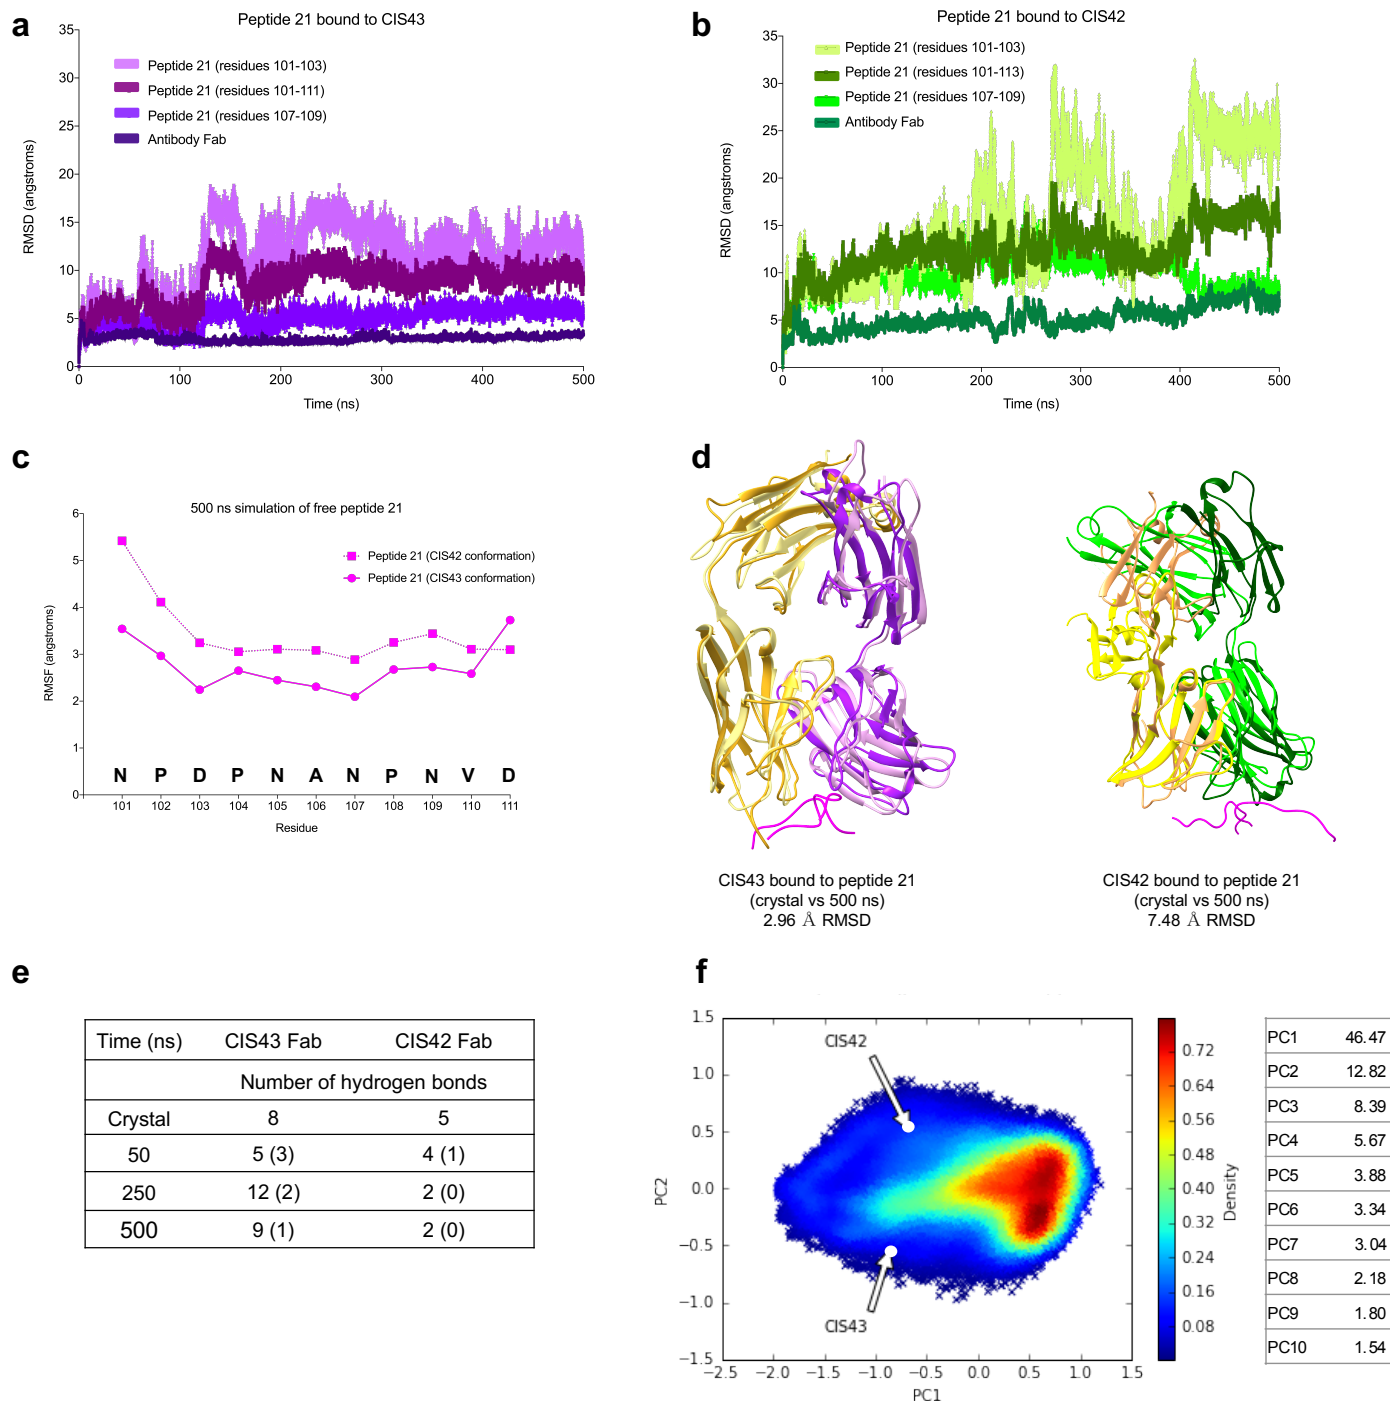

### Supplementary Figure 8 Molecular Dynamics (MD) Simulations.

**a**, RMSD for CIS43 Fab bound to peptide 21 over 500 nanoseconds (ns) of MD. CIS43 Fab heavy and light chain were used to align the trajectories. CIS43 Fab is depicted in indigo; full peptide 21 (residues 101-111) is depicted in plum; residues 107-109 in grape; and residues 101-103 in lavender. **b**, RMSD of CIS42 Fab bound to peptide 21 over 500 ns of MD, calculated the same as in **a**. CIS42 Fab is depicted in dark green; full peptide 21 (residues 101-113) is depicted in forest green; residues 107-109 in mint; and residues 101-103 in lime. **c**, RMSF of 500 ns of free peptide 21 beginning from its CIS43 Fab conformation (depicted in magenta circles and a solid line) and RMSF of free peptide 21 beginning from its CIS42 Fab conformation (depicted in magenta squares with a dotted line). **d**, CIS43 and CIS42 Fab crystal structures aligned to their 500 ns frames respectively. Color key for CIS43 Fab: crystal heavy chain shown in purple and crystal light chain shown in gold; 500 ns heavy chain shown in lavender and 500 ns light chain shown in khaki. Color key for CIS42 fab: crystal heavy chain shown in dark green and crystal light chain shown in sandy brown; 500 ns heavy chain shown in bright green and 500 ns light chain shown in yellow. **e**, Hydrogen bonding analysis of peptide 21 in complex with CIS42 and CIS43 Fabs over 500 ns compared to the respective crystal structures. Hydrogen bonds were calculated between peptide residues and the Fab binding interface. Numbers in parentheses indicate bonds present in the crystal structure. **f**, Principal component analysis (PCA) of 500 ns of free peptide 21 colored by the number of times specific conformations occur. PC1 is plotted on the x-axis and PC2 is plotted on the y-axis. Crystal structures of peptide 21 in CIS42 and CIS43 Fab conformations are labeled with gray arrows. The top ten eigen values from the PCA analyses are listed in the table. Number of frames analyzed,  $n = 50,000$ .



**a**

Peptide 20 NPDPNANPNPN  
 Peptide 21 NPDPNANPNVDPN  
 Peptide 25 NVDPNANPNVD  
 Peptide 29 NPNANPNA  
 1<sup>st</sup> 2<sup>nd</sup> 3<sup>rd</sup>

CIS43 Fab

| Phi, Psi (°) | Peptide 20      |           |     | Peptide 21      |           |          | Peptide 25      |           |     | Peptide 29       |           |     |
|--------------|-----------------|-----------|-----|-----------------|-----------|----------|-----------------|-----------|-----|------------------|-----------|-----|
|              | 1st             | 2nd       | 3rd | 1st             | 2nd       | 3rd      | 1st             | 2nd       | 3rd | 1st              | 2nd       | 3rd |
| N1/D         | -92, 115        | -135, 111 | NA  | -96, 105        | -138, 100 | -91, 106 | -100, 111       | -144, 108 | NA  | NA               | -141, 107 | NA  |
| P            | -63, -18        | -66, -10  | NA  | -63, -14        | -53, -25  | -66, -15 | -69, -14        | -68, -12  | NA  | -100, <b>121</b> | -44, -25  | NA  |
| N2           | -92, -4         | -85, 0    | NA  | -92, -1         | -69, -14  | NA       | -100, 6         | -74, -12  | NA  | -60, -63         | -75, -26  | NA  |
| A/V          | -58, <b>-51</b> | NA        | NA  | -60, <b>-43</b> | -92, 119  | NA       | -57, <b>-43</b> | -94, 118  | NA  | -70, <b>-141</b> | -82, 103  | NA  |

**b**

Peptide 20 NPDPNANPNVD  
 Peptide 21 NPDPNANPNVDPN  
 Peptide 25 NVDPNANPNVDPN  
 Peptide 29 ANPNANPNA  
 1<sup>st</sup> 2<sup>nd</sup> 3<sup>rd</sup> 4<sup>th</sup>

CIS42 Fab

| Phi, Psi (°) | Peptide 20 |          |                | Peptide 21 |                |          | Peptide 25 |           |          | Peptide 29      |          |                |
|--------------|------------|----------|----------------|------------|----------------|----------|------------|-----------|----------|-----------------|----------|----------------|
|              | 1st        | 2nd      | 3rd            | 2nd        | 3rd            | 4th      | 2nd        | 3rd       | 4th      | 1st             | 2nd      | 3rd            |
| N1/D         | NA         | -79, 132 | -93, 123       | -61, 125   | -111, 121      | -73, 123 | -86, 117   | -100, 118 | -65, 120 | <b>51</b> , 60  | -69, 122 | -101, 117      |
| P            | NA         | -68, -24 | -71, -12       | -61, -25   | -67, -18       | -79, -3  | -64, -24   | -65, -19  | -89, 26  | -71, -24        | -61, -27 | -65, -20       |
| N2           | NA         | -82, -15 | -84, <b>60</b> | -83, -9    | -87, <b>67</b> |          | -85, -8    | -80, 0    |          | -91, <b>-66</b> | -80, -15 | -78, <b>61</b> |
| A/V          | NA         | -64, 140 | -77, 158       | -75, 162   | -134, 159      |          | -73, 151   | -65, 145  |          | -68, 153        | -70, 149 |                |

**c**

|   | Phi, Psi (°)       |
|---|--------------------|
| N | -99 ± 26, 113 ± 15 |
| P | -68 ± 12, -16 ± 12 |
| N | -82 ± 10, -12 ± 17 |
| A | -76 ± 20, 142 ± 20 |

**d**

|   | Phi, Psi (°) |
|---|--------------|
| N | -69, 118     |
| P | -71, -6      |
| N | -110, -16    |
| A | -80, 165     |

**Supplementary Figure 9 Structural repeat motif analysis.**

Phi and Psi angles (°) for residues N/D, P, N and A/V of the repeat motif for **a**, PfCSP peptides bound to CIS43 Fab; **b**, PfCSP peptides bound to CIS42 Fab; **c**, Average plus/minus one standard deviation for **a** and **b**; and **d**, Crystal structure of NPNA determined by Ghasparian et al.<sup>28</sup>. The alignment of the repeat motif peptide, based on the crystal structures as described in Fig. 4 and Supplementary Fig. 6, are shown as indicated. The NPN repeat motif occurrences are underlined under the sequences. Highlighted in red are the notable outliers for which Phi and/or Psi is 60° different compared to others in the same row. For peptides bound to CIS43 Fab, this difference is in the first A/V, leading to a repeating structure of NPNA-NPNA; for peptides bound to CIS42 Fab, this difference is with N2 (the Asn following the Pro), leading to a repeating structure of ANPN-ANPN. We note that the Phi, Psi angles for the 1<sup>st</sup> occurrence of the NPN repeat in peptide 29 bound to mAb CIS43 differs from the rest as shown in Fig. 4.



**Supplementary Table 1 PfcSP immunoglobulin V-gene family usage.**

| mAb   | V <sub>H</sub> | V <sub>H</sub> maturation (nt, %) | D          | J <sub>H</sub> | CDRH3 length (aa) | V <sub>L</sub> | V <sub>L</sub> maturation (%) | J <sub>L</sub> |
|-------|----------------|-----------------------------------|------------|----------------|-------------------|----------------|-------------------------------|----------------|
| CIS06 | VH1-58*01      | 4.2                               | DH1-1*01   | JH5*02         | 14                | Vκ1-39*01      | 11.1                          | Jκ2*01         |
| CIS23 | VH3-30*03      | 2.1                               | DH6-13*01  | JH4*02         | 15                | Vκ3-11*01      | 1.9                           | Jκ2*01         |
| CIS34 | VH3-33*01      | 2.8                               | DH6-13*13  | JH5*02         | 17                | Vκ1-39*01      | 3.7                           | Jκ3*01         |
| CIS42 | VH7-4-1*02     | 3.1                               | DH5-18*01  | JH4*02         | 12                | Vλ2-23*02      | 3.5                           | Jλ3*02         |
| CIS43 | VH1-3*01       | 3.8                               | DH4-23*01  | JH3*02         | 14                | Vκ4-1*01       | 2.9                           | Jκ4*01         |
| mAb04 | VH3~33*01      | 2.0                               | DH3~22*01  | JH4*02         | 16                | Vκ2D~29*01     | 0.0                           | Jκ2*01         |
| mAb09 | VH3~33*01      | 3.1                               | DH3~22*01  | JH3*02         | 15                | Vκ3~11*01      | 1.4                           | Jκ3*01         |
| mAb10 | VH3~33*01,04   | 3.3                               | DH4~23*01  | JH4*02         | 16                | Vκ1~5*01       | 1.7                           | Jκ1*01         |
| mAb15 | VH3~33*01      | 0.2                               | DH3~22*01  | JH6*02         | 22                | Vκ3~20*01      | 0.3                           | Jκ1*01         |
| mAb19 | VH6~1*01       | 1.1                               | DH2~2*01   | JH1*01         | 13                | Vκ4~1*01       | 1.1                           | Jκ4*01         |
| mAb21 | VH3~30*04      | 2.9                               | DH2~1R2*01 | JH3*02         | 10                | Vλ2~8*01       | 0.6                           | Jλ1*01         |
| mAb22 | VH3~33*01      | 0.5                               | DH2~21*02  | JH4*02         | 19                | Vκ3~20*01      | 0.0                           | Jκ3*01         |
| mAb25 | VH3~33*01      | 1.7                               | DH6~13*01  | JH3*02         | 19                | Vκ1~5*03       | 1.2                           | Jκ1*01         |
| mAb26 | VH3~48*03      | 0.7                               | DH2~2*01   | JH4*02         | 18                | Vκ1~5*03       | 0.3                           | Jκ1*01         |
| mAb27 | VH3~49*03      | 0.8                               | DH6~13*01  | JH4*02         | 12                | Vκ3~15*01      | 0.3                           | Jκ1*01         |
| mAb28 | VH4~34*12      | 3.7                               | DH4~17*01  | JH4*02         | 13                | Vκ1D~17*01     | 2.0                           | Jκ4*01         |
| mAb30 | VH3~33*01      | 1.5                               | DH4~17*01  | JH4*02         | 16                | Vκ1~5*03       | 0.0                           | Jκ1*01         |

V, variable region; H, heavy chain; L, light chain; κ, Kappa; λ, Lambda; nt, nucleotides; aa, amino acid. Yellow-highlighted, mAbs isolated from PfcSP-specific memory B cells. Non-highlighted, mAbs isolated from plasmablasts.

**Supplementary Table 2** Biolayer interferometry kinetics of PfCSP mAbs binding to rPfCSP, Peptide 21, or Peptide 29.

| <b>a</b> | <b>PfCSP</b><br>(sensor) | mAb   | $K_D$ (M) | $K_D$ Error | $k_{on}$ (1/Ms) | $k_{on}$ Error | $k_{dis}$ (1/s) | $k_{dis}$ Error |
|----------|--------------------------|-------|-----------|-------------|-----------------|----------------|-----------------|-----------------|
|          |                          | 2A10  | 1.50E-10  | 1.47E-11    | 1.11E+05        | 2.48E+03       | 1.66E-05        | 1.59E-06        |
|          |                          | CIS06 | n/a       | n/a         | n/a             | n/a            | n/a             | n/a             |
|          |                          | CIS23 | 1.55E-09  | 7.19E-11    | 1.91E+05        | 8.60E+03       | 2.96E-04        | 3.08E-06        |
|          |                          | CIS34 | 1.50E-09  | 7.74E-11    | 1.55E+05        | 7.32E+03       | 2.33E-04        | 4.78E-06        |
|          |                          | CIS42 | 6.72E-10  | 1.92E-11    | 1.53E+05        | 3.15E+03       | 1.03E-04        | 2.04E-06        |
|          |                          | CIS43 | 9.12E-10  | 8.24E-11    | 1.47E+05        | 1.24E+04       | 1.34E-04        | 4.22E-06        |

  

| <b>b</b> | <b>Peptide 21</b><br>(sensor) | mAb   | $K_D$ (M) | $K_D$ Error | $k_{on}$ (1/Ms) | $k_{on}$ Error | $k_{dis}$ (1/s) | $k_{dis}$ Error |
|----------|-------------------------------|-------|-----------|-------------|-----------------|----------------|-----------------|-----------------|
|          |                               | 2A10  | 5.79E-11  | 7.26E-12    | 2.69E+05        | 3.22E+03       | 1.56E-05        | 1.94E-06        |
|          |                               | CIS06 | n/a       | n/a         | n/a             | n/a            | n/a             | n/a             |
|          |                               | CIS23 | 6.06E-09  | 9.48E-10    | 6.21E+06        | 9.25E+05       | 3.76E-02        | 1.80E-03        |
|          |                               | CIS34 | 9.26E-11  | 1.80E-11    | 5.72E+05        | 1.80E+04       | 5.30E-05        | 1.02E-05        |
|          |                               | CIS42 | 1.69E-09  | 9.39E-11    | 4.20E+05        | 2.28E+04       | 7.09E-04        | 8.47E-06        |
|          |                               | CIS43 | <1.0E-12  | 1.14E-11    | 2.45E+05        | 4.61E+03       | <1.0E-07        | n.d.            |

  

| <b>c</b> | <b>Peptide 29</b><br>(sensor) | mAb   | $K_D$ (M) | $K_D$ Error | $k_{on}$ (1/Ms) | $k_{on}$ Error | $k_{dis}$ (1/s) | $k_{dis}$ Error |
|----------|-------------------------------|-------|-----------|-------------|-----------------|----------------|-----------------|-----------------|
|          |                               | 2A10  | 1.77E-09  | 7.12E-11    | 6.66E+05        | 2.61E+04       | 1.18E-03        | 1.03E-05        |
|          |                               | CIS06 | n/a       | n/a         | n/a             | n/a            | n/a             | n/a             |
|          |                               | CIS23 | 2.18E-09  | 1.16E-10    | 6.91E+05        | 3.60E+04       | 1.50E-03        | 1.54E-05        |
|          |                               | CIS34 | 1.03E-09  | 4.76E-11    | 5.86E+05        | 2.56E+04       | 6.05E-04        | 9.19E-06        |
|          |                               | CIS42 | 2.21E-09  | 2.80E-10    | 3.36E+06        | 4.09E+05       | 7.43E-03        | 2.69E-04        |
|          |                               | CIS43 | 4.66E-09  | 3.88E-10    | 1.39E+06        | 1.13E+05       | 6.46E-03        | 9.94E-05        |

Errors are from model fitting.

$K_D$ , affinity constant.  $K_D$  indicates the ratio of the association rate constant ( $k_{on}$ ) to the dissociation rate constant ( $k_{dis}$ ).

**Supplementary Table 3 Data collection and refinement statistics for CIS43 Fab**

|                                                      | CIS43 Fab<br>with peptide 20 | CIS43 Fab<br>with peptide 21 | CIS43 Fab<br>with peptide 25 | CIS43 Fab<br>with peptide 29 |
|------------------------------------------------------|------------------------------|------------------------------|------------------------------|------------------------------|
| <b>Data collection</b>                               |                              |                              |                              |                              |
| Space group                                          | C2                           | C2                           | C2                           | C2                           |
| Cell dimensions                                      |                              |                              |                              |                              |
| <i>a</i> , <i>b</i> , <i>c</i> (Å)                   | 93.94, 61.67, 75.37          | 93.48, 61.86, 75.06          | 93.07, 60.42, 83.31          | 93.24, 60.41, 84.84          |
| $\alpha$ , $\beta$ , $\gamma$ (°)                    | 90.00, 106.04, 90.00         | 90.00, 105.51, 90.00         | 90.00, 102.83, 90.00         | 90.00, 107.02, 90.00         |
| Resolution (Å)                                       | 50-2.40 (2.44-2.40)*         | 50-1.79 (1.82-1.79)*         | 50-1.98 (2.01-1.98)*         | 50-2.18 (2.22-2.18)*         |
| <i>R</i> <sub>sym</sub> or <i>R</i> <sub>merge</sub> | 15.4 (31.3)                  | 10.3 (33.8)                  | 8.8 (55.2)                   | 14.7 (56.1)                  |
| <i>I</i> / <i>σ</i>                                  | 6.1 (2.4)                    | 9.6 (2.4)                    | 13.9 (2.2)                   | 13.5 (1.5)                   |
| Completeness (%)                                     | 93.3 (75.1)                  | 94.7 (97.9)                  | 99.6 (92.7)                  | 98.7 (85.4)                  |
| Redundancy                                           | 2.9 (2.2)                    | 3.2 (2.7)                    | 3.7 (3.3)                    | 6.2 (3.7)                    |
| <b>Refinement</b>                                    |                              |                              |                              |                              |
| Resolution (Å)                                       | 45.14-2.40<br>(2.48-2.40)    | 39.00-1.79<br>(1.83-1.79)    | 40.61-1.98<br>(2.05-1.98)    | 46.09-2.19<br>(2.27-2.19)    |
| No. reflections                                      | 15362                        | 37098                        | 31443                        | 22789                        |
| <i>R</i> <sub>work</sub> / <i>R</i> <sub>free</sub>  | 19.85/23.78 (25.79/30.24)    | 20.67/23.47 (27.90/31.20)    | 17.45/20.94 (23.15-28.10)    | 19.29/24.01<br>(28.64/34.48) |
| No. atoms                                            | 3473                         | 3778                         | 3673                         | 3546                         |
| Protein                                              | 3408                         | 3433                         | 3459                         | 3422                         |
| Water                                                | 65                           | 321                          | 214                          | 124                          |
| Ligand                                               |                              | 24                           |                              |                              |
| B-factors (Å <sup>2</sup> )                          | 50.0                         | 41.1                         | 43.8                         | 52.5                         |
| Protein                                              | 50.1                         | 40.5                         | 43.9                         | 52.7                         |
| Water                                                | 40.8                         | 42.5                         | 41.0                         | 47.35                        |
| Ligand                                               |                              | 101.3                        |                              |                              |
| R.m.s deviations                                     |                              |                              |                              |                              |
| Bond lengths (Å)                                     | 0.006                        | 0.003                        | 0.005                        | 0.002                        |
| Bond angles (°)                                      | 0.82                         | 0.72                         | 0.77                         | 0.61                         |
| Ramachadran Favored %                                | 97.5                         | 98.0                         | 98.0                         | 95.3                         |
| Ramachadran Outliers %                               | 0.0                          | 0.0                          | 0.0                          | 0.0                          |
| MolProbity all-atoms clashscore                      | 1.78                         | 6.17                         | 3.22                         | 1.33                         |
| <b>PDB ID</b>                                        | 6B5L                         | 6B5M                         | 6B5N                         | 6B5O                         |

\* Statistics for the highest-resolution shell are shown in parentheses.

**Supplementary Table 4 Detailed interactions of CIS43 Fab with peptides 20, 21, 25, and 29 (from Pis a web server).**

**a. Detailed interactions of peptide 20 with Fab CIS43 Heavy chain.**

| Peptide 20 | HSDC | ASA    | BSA    | CIS43 Heavy | HSDC | ASA    | BSA   | Hydrogen Bonds |           |                |
|------------|------|--------|--------|-------------|------|--------|-------|----------------|-----------|----------------|
| A:ASN 1    | -    | 199.53 | 0.00   | H:TYR 32    |      | 49.03  | 7.29  | Peptide 20     | Dist. [Å] | CIS43 Heavy    |
| A:PRO 2    |      | 118.85 | 0.00   | H:ALA 33    | H    | 27.96  | 26.05 | A:ASN 7[HD21]  | 1.92      | H:LEU 95[ O ]  |
| A:ASP 3    | S    | 90.55  | 13.65  | H:His 35    |      | 32.22  | 23.42 | A:ASN 9[HD21]  | 2.16      | H:ALA 33[ O ]  |
| A:PRO 4    |      | 110.37 | 0.00   | H:TRP 47    |      | 83.63  | 5.61  | A:ASN 9[HD22]  | 2.38      | H:LEU 95[ O ]  |
| A:ASN 5    |      | 121.53 | 52.07  | H:TRP 50    |      | 49.50  | 40.34 | A:ASN 9[ O ]   | 2.06      | H:LEU 98[ H ]  |
| A:ALA 6    |      | 89.92  | 24.79  | H:LYS 52    |      | 88.27  | 22.27 | A:ASN 9[ OD1]  | 1.89      | H:ALA 33[ H ]  |
| A:ASN 7    | H    | 71.07  | 41.08  | H:ARG 58    | S    | 155.23 | 70.57 | Salt Bridges   |           |                |
| A:PRO 8    |      | 111.17 | 69.87  | H:LEU 95    | H    | 47.07  | 11.42 | Peptide 20     | Dist. [Å] | CIS43 Heavy    |
| A:ASN 9    | H    | 137.53 | 131.64 | H:THR 96    |      | 86.35  | 25.23 | A:ASP 3[ OD1]  | 3.97      | H:ARG 58[ NH1] |
| A:VAL 10   |      | 162.15 | 52.29  | H:VAL 97    |      | 13.22  | 13.22 | A:ASP 3[ OD2]  | 3.80      | H:ARG 58[ NH1] |
|            |      |        |        | H:LEU 98    | H    | 134.90 | 45.59 | A:ASP 3[ OD2]  | 3.90      | H:ARG 58[ NH2] |
|            |      |        |        | H:THR 99    |      | 56.24  | 7.36  |                |           |                |

**b. Detailed interactions of peptide 20 with Fab CIS43 Light chain.**

| Peptide 20 | HSDC | ASA    | BSA   | CIS43 Kappa | HSDC | ASA    | BSA   | Hydrogen Bonds |           |               |
|------------|------|--------|-------|-------------|------|--------|-------|----------------|-----------|---------------|
| A:ASN 1    |      | 199.53 | 57.13 | L:TYR 27D   |      | 109.98 | 47.82 | Peptide 20     | Dist. [Å] | CIS43 Kappa   |
| A:PRO 2    |      | 118.85 | 97.83 | L:TYR 32    |      | 44.44  | 22.80 | A:ASP 3[ H ]   | 2.09      | L:TYR 92[ O ] |
| A:ASP 3    | H    | 90.55  | 28.99 | L:TRP 50    |      | 83.84  | 15.63 |                |           |               |
| A:PRO 4    |      | 110.37 | 0.00  | L:TYR 91    |      | 63.53  | 38.40 |                |           |               |
| A:ASN 5    |      | 121.53 | 1.68  | L:TYR 92    | H    | 82.09  | 69.83 |                |           |               |
| A:ALA 6    |      | 89.92  | 65.12 | L:SER 93    |      | 39.00  | 10.15 |                |           |               |
| A:ASN 7    |      | 71.07  | 29.99 | L:SER 94    |      | 101.58 | 34.26 |                |           |               |
| A:PRO 8    |      | 111.17 | 0.00  | L:LEU 96    |      | 109.67 | 39.66 |                |           |               |
| A:ASN 9    |      | 137.53 | 0.00  |             |      |        |       |                |           |               |
| A:VAL 10   |      | 162.15 | 65.76 |             |      |        |       |                |           |               |

**c. Detailed interactions of peptide 21 with Fab CIS43 Heavy chain.**

| Peptide 21 | HSDC | ASA    | BSA    | CIS43 Heavy | HSDC | ASA    | BSA    | Hydrogen Bonds |           |                   |
|------------|------|--------|--------|-------------|------|--------|--------|----------------|-----------|-------------------|
| A:ASN 1    |      | 194.02 | 0.00   | H:TYR 32    |      | 56.26  | 8.63   | Peptide 21     | Dist. [Å] | CIS43 Heavy chain |
| A:PRO 2    |      | 120.14 | 0.00   | H:ALA 33    | H    | 26.67  | 25.54  | A:ASN 7[HD21]  | 2.16      | H:LEU 95[ O ]     |
| A:ASP 3    | HS   | 93.11  | 17.94  | H:His 35    |      | 29.20  | 21.26  | A:ASN 9[HD21]  | 1.94      | H:ALA 33[ O ]     |
| A:PRO 4    |      | 87.09  | 0.00   | H:TRP 47    |      | 88.95  | 5.74   | A:ASN 9[HD22]  | 2.47      | H:LEU 95[ O ]     |
| A:ASN 5    |      | 123.25 | 45.86  | H:TRP 50    |      | 51.96  | 40.63  | A:ASP 11[ H ]  | 1.95      | H:LEU 98[ O ]     |
| A:ALA 6    |      | 88.01  | 25.03  | H:LYS 52    |      | 88.24  | 26.49  | A:ASP 3[ OD2]  | 2.46      | H:ARG 58[HH12]    |
| A:ASN 7    | H    | 69.29  | 40.59  | H:ARG 58    | HS   | 155.20 | 63.65  | A:ASN 9[ O ]   | 2.30      | H:LEU 98[ H ]     |
| A:PRO 8    |      | 114.61 | 73.02  | H:LEU 95    | H    | 44.74  | 11.66  | A:ASN 9[ OD1]  | 1.87      | H:ALA 33[ H ]     |
| A:ASN 9    | H    | 135.47 | 127.77 | H:THR 96    |      | 89.74  | 27.30  | Salt Bridges   |           |                   |
| A:VAL 10   |      | 92.43  | 37.13  | H:VAL 97    |      | 13.56  | 113.56 | Peptide 21     | Dist. [Å] | CIS43 Heavy chain |
| A:ASP 11   | H    | 96.40  | 49.84  | H:LEU 98    | H    | 135.94 | 55.85  | A:ASP 3[ OD2]  | 3.27      | H:ARG 58[ NH1]    |
| A:PRO 12   |      | 102.27 | 0.00   | H:THR 99    |      | 47.76  | 10.46  | A:ASP 3[ OD2]  | 3.73      | H:ARG 58[ NH2]    |
| A:ASN 13   |      | 166.91 | 19.49  | H:PRO 100   |      | 141.94 | 33.54  |                |           |                   |

**d. Detailed interactions of peptide 21 with Fab CIS43 Light chain.**

| Peptide 21 | HSDC | ASA    | BSA    | CIS43 Kappa | HSDC | ASA    | BSA   | Hydrogen Bonds |           |                |
|------------|------|--------|--------|-------------|------|--------|-------|----------------|-----------|----------------|
| A:ASN 1    | H    | 194.02 | 54.57  | L:TYR 27D   |      | 109.91 | 48.68 | Peptide 21     | Dist. [Å] | CIS43 Kappa    |
| A:PRO 2    |      | 120.14 | 100.05 | L:ASN 28    |      | 58.73  | 17.46 | A:ASN 1[ H2 ]  | 2.42      | L:TYR 92[ OH ] |
| A:ASP 3    | H    | 93.11  | 34.37  | L:LYS 30    |      | 78.55  | 23.86 | A:ASP 3[ H ]   | 1.90      | L:TYR 92[ O ]  |
| A:PRO 4    |      | 87.09  | 0.00   | L:TYR 32    |      | 42.77  | 37.02 |                |           |                |
| A:ASN 5    |      | 123.25 | 1.12   | L:TRP 50    |      | 82.72  | 35.24 |                |           |                |
| A:ALA 6    |      | 88.01  | 62.98  | L:His 89    |      | 12.98  | 2.14  |                |           |                |
| A:ASN 7    |      | 69.29  | 28.70  | L:TYR 91    |      | 63.55  | 40.01 |                |           |                |
| A:PRO 8    |      | 114.61 | 0.00   | L:TYR 92    | H    | 88.13  | 69.67 |                |           |                |
| A:ASN 9    |      | 135.47 | 0.00   | L:SER 93    |      | 42.00  | 14.88 |                |           |                |
| A:VAL 10   |      | 92.43  | 50.05  | L:SER 94    |      | 105.57 | 35.12 |                |           |                |
| A:ASP 11   |      | 96.40  | 4.54   | L:LEU 96    |      | 106.03 | 37.79 |                |           |                |
| A:PRO 12   |      | 102.27 | 55.27  |             |      |        |       |                |           |                |
| A:ASN 13   |      | 166.91 | 21.93  |             |      |        |       |                |           |                |

**ASA** Accessible Surface Area, Å<sup>2</sup> **BSA** Buried Surface Area, Å<sup>2</sup> ||||| Buried area percentage, one bar per 10%

e. Detailed interactions of peptide 25 with CIS43 Fab heavy chain.

| Peptide 25 | HSDC | ASA    | BSA    | CIS43 Heavy | HSDC | ASA    | BSA   |
|------------|------|--------|--------|-------------|------|--------|-------|
| A:ASN 1    |      | 204.34 | 0.00   | H:TYR 32    |      | 73.01  | 4.87  |
| A:VAL 2    |      | 140.85 | 0.00   | H:ALA 33    | H    | 31.39  | 28.22 |
| A:ASP 3    | HS   | 85.41  | 25.29  | H:HIS 35    |      | 30.84  | 22.87 |
| A:PRO 4    |      | 103.23 | 0.00   | H:TRP 47    |      | 86.62  | 5.61  |
| A:ASN 5    |      | 117.88 | 47.97  | H:TRP 50    |      | 53.75  | 43.06 |
| A:ALA 6    |      | 86.60  | 24.02  | H:LYS 52    |      | 91.06  | 32.75 |
| A:ASN 7    | H    | 69.29  | 41.73  | H:ARG 58    | HS   | 159.04 | 55.37 |
| A:PRO 8    |      | 108.99 | 68.01  | H:LEU 95    | H    | 45.54  | 10.84 |
| A:ASN 9    | H    | 136.99 | 126.00 | H:THR 96    |      | 83.39  | 27.92 |
| A:VAL 10   |      | 107.06 | 40.74  | H:VAL 97    |      | 25.86  | 18.59 |
| A:ASP 11   | H    | 188.81 | 44.16  | H:LEU 98    | H    | 130.67 | 53.27 |
|            |      |        |        | H:THR 99    |      | 73.05  | 6.36  |
|            |      |        |        | H:PRO 100   |      | 138.92 | 16.24 |

| Hydrogen Bonds |           |                   |
|----------------|-----------|-------------------|
| Peptide 25     | Dist. [Å] | CIS43 Heavy chain |
| A:ASN 7[HD21]  | 2.12      | H:LEU 95[ O ]     |
| A:ASN 9[HD21]  | 2.01      | H:ALA 33[ O ]     |
| A:ASN 9[HD22]  | 2.40      | H:LEU 95[ O ]     |
| A:ASP 11[ H ]  | 2.33      | H:LEU 98[ O ]     |
| A:ASP 3[ OD2]  | 2.43      | H:ARG 58[HH12]    |
| A:ASN 9[ O ]   | 2.25      | H:LEU 98[ H ]     |
| A:ASN 9[ OD1]  | 2.04      | H:ALA 33[ H ]     |

| Salt Bridges  |           |                   |
|---------------|-----------|-------------------|
| Peptide 25    | Dist. [Å] | CIS43 Heavy chain |
| A:ASP 3[ OD1] | 3.81      | H:ARG 58[ NH1]    |
| A:ASP 3[ OD2] | 3.07      | H:ARG 58[ NH1]    |
| A:ASP 3[ OD2] | 3.22      | H:ARG 58[ NH2]    |

f. Detailed interactions of peptide 25 with Fab CIS43 Light chain.

| Peptide 25 | HSDC | ASA    | BSA    | CIS43 Kappa | HSDC | ASA    | BSA   |
|------------|------|--------|--------|-------------|------|--------|-------|
| A:ASN 1    |      | 204.34 | 49.19  | L:TYR 27D   |      | 101.73 | 36.39 |
| A:VAL 2    |      | 140.85 | 111.89 | L:TYR 32    |      | 41.78  | 25.64 |
| A:ASP 3    | H    | 85.41  | 32.89  | L:TRP 50    |      | 72.61  | 19.70 |
| A:PRO 4    |      | 103.23 | 0.00   | L:HIS 89    |      | 14.47  | 3.03  |
| A:ASN 5    |      | 117.88 | 1.54   | L:TYR 91    |      | 60.81  | 37.89 |
| A:ALA 6    |      | 86.60  | 63.77  | L:TYR 92    | H    | 90.54  | 67.82 |
| A:ASN 7    |      | 69.29  | 27.11  | L:SER 93    |      | 43.52  | 17.68 |
| A:PRO 8    |      | 108.99 | 0.00   | L:SER 94    |      | 103.17 | 40.15 |
| A:ASN 9    |      | 136.99 | 0.00   | L:LEU 96    |      | 104.68 | 35.83 |
| A:VAL 10   |      | 107.06 | 64.61  |             |      |        |       |
| A:ASP 11   |      | 188.81 | 5.57   |             |      |        |       |

| Hydrogen Bonds |           |               |
|----------------|-----------|---------------|
| Peptide 25     | Dist. [Å] | CIS43 Kappa   |
| A:ASP 3[ H ]   | 2.15      | L:TYR 92[ O ] |

g. Detailed interactions of peptide 29 with Fab CIS43 Heavy chain.

| Peptide 29 | HSDC | ASA    | BSA    | CIS43 heavy chain | HSDC | ASA    | BSA   |
|------------|------|--------|--------|-------------------|------|--------|-------|
| A:ASN 3    |      | 152.02 | 0.00   | H:TYR 32          |      | 70.79  | 8.03  |
| A:PRO 4    |      | 112.17 | 0.00   | H:ALA 33          | H    | 28.80  | 27.39 |
| A:ASN 5    |      | 157.68 | 1.97   | H:HIS 35          |      | 32.94  | 23.54 |
| A:ALA 6    |      | 77.61  | 11.11  | H:TRP 50          |      | 53.65  | 33.85 |
| A:ASN 7    | H    | 80.26  | 48.53  | H:LYS 52          |      | 93.44  | 18.67 |
| A:PRO 8    |      | 129.13 | 78.52  | H:LEU 94          |      | 0.45   | 0.45  |
| A:ASN 9    | H    | 136.85 | 127.93 | H:LEU 95          | H    | 42.46  | 10.80 |
| A:ALA 10   |      | 69.81  | 29.58  | H:THR 96          |      | 89.48  | 29.30 |
| A:ASN 11   |      | 190.99 | 40.11  | H:VAL 97          |      | 18.02  | 15.73 |
|            |      |        |        | H:LEU 98          | H    | 125.94 | 49.24 |
|            |      |        |        | H:THR 99          |      | 67.65  | 4.33  |
|            |      |        |        | H:PRO 100         |      | 142.86 | 11.88 |

| Hydrogen Bonds |           |                   |
|----------------|-----------|-------------------|
| Peptide 29     | Dist. [Å] | CIS43 heavy chain |
| A:ASN 7[HD21]  | 1.87      | H:LEU 95[ O ]     |
| A:ASN 9[HD21]  | 1.98      | H:ALA 33[ O ]     |
| A:ASN 9[ O ]   | 2.22      | H:LEU 98[ H ]     |
| A:ASN 9[ OD1]  | 2.10      | H:ALA 33[ H ]     |

h. Detailed interactions of peptide 29 with Fab CIS43 Light chain.

| Peptide 29 | HSDC | ASA    | BSA   | CIS43 Kappa | HSDC | ASA    | BSA   |
|------------|------|--------|-------|-------------|------|--------|-------|
| A:ASN 3    |      | 152.02 | 50.02 | L:TYR 27D   |      | 91.00  | 44.32 |
| A:PRO 4    |      | 112.17 | 74.83 | L:ASN 28    |      | 59.18  | 5.25  |
| A:ASN 5    |      | 157.68 | 49.31 | L:LYS 30    |      | 78.39  | 10.07 |
| A:ALA 6    | H    | 77.61  | 62.66 | L:TYR 32    |      | 42.26  | 33.09 |
| A:ASN 7    |      | 80.26  | 31.73 | L:TRP 50    |      | 75.38  | 29.47 |
| A:PRO 8    |      | 129.13 | 0.00  | L:HIS 89    |      | 11.69  | 2.17  |
| A:ASN 9    |      | 136.85 | 0.00  | L:TYR 91    |      | 57.24  | 33.66 |
| A:ALA 10   |      | 69.81  | 40.23 | L:TYR 92    |      | 87.31  | 59.89 |
| A:ASN 11   |      | 190.99 | 44.54 | L:SER 93    |      | 43.13  | 15.12 |
|            |      |        |       | L:SER 94    | H    | 98.77  | 39.18 |
|            |      |        |       | L:LEU 96    |      | 105.03 | 30.85 |

| Hydrogen Bonds |           |                   |
|----------------|-----------|-------------------|
| Peptide 29     | Dist. [Å] | CIS43 light chain |
| A:ALA 6[ O ]   | 3.83      | L:SER 94[ OG ]    |

**ASA** Accessible Surface Area, Å<sup>2</sup> **BSA** Buried Surface Area, Å<sup>2</sup> |||| Buried area percentage, one bar per 10%

**Supplementary Table 5 Data collection and refinement statistics for CIS42 Fab**

|                                                      | CIS42 Fab with peptide 20                             | CIS42 Fab with peptide 21                                        | CIS42 Fab with peptide 25                     | CIS42 Fab with peptide 29                     |
|------------------------------------------------------|-------------------------------------------------------|------------------------------------------------------------------|-----------------------------------------------|-----------------------------------------------|
| <b>Data collection</b>                               |                                                       |                                                                  |                                               |                                               |
| Space group                                          | P2 <sub>1</sub> 2 <sub>1</sub> 2 <sub>1</sub>         | P2 <sub>1</sub> 2 <sub>1</sub> 2 <sub>1</sub>                    | P2 <sub>1</sub> 2 <sub>1</sub> 2 <sub>1</sub> | P2 <sub>1</sub> 2 <sub>1</sub> 2 <sub>1</sub> |
| Cell dimensions                                      |                                                       |                                                                  |                                               |                                               |
| <i>a</i> , <i>b</i> , <i>c</i> (Å)                   | 41.83, 70.68, 166.73                                  | 41.13, 70.57, 165.34                                             | 41.96, 70.82, 164.9                           | 41.58, 70.67, 163.36                          |
| $\alpha$ , $\beta$ , $\gamma$ (°)                    | 90.0, 90.0, 90.0                                      | 90.0, 90.0, 90.0                                                 | 90.0, 90.0, 90.0                              | 90.0, 90.0, 90.0                              |
| Resolution (Å)                                       | 50-2.30 (2.48-2.43, 2.43-2.38, 2.38-2.34, 2.34-2.30)* | 50-1.77 (1.95-1.91, 1.91-1.87, 1.87-1.83, 1.83-1.80, 1.80-1.77)* | 50-1.98 (2.01-1.98)*                          | 50-2.22 (2.26-2.22)*                          |
| <i>R</i> <sub>sym</sub> or <i>R</i> <sub>merge</sub> | 7.5 (16.5, 18.3, 18.5, 18.8)                          | 5.9 (22.2, 28.6, 30.4, 30.8, 32.7)                               | 13.5 (70.9)                                   | 5.6 (16.4)                                    |
| <i>I</i> / <i>σ</i> <i>I</i>                         | 19.8 (5.9, 5.4, 4.9, 4.5)                             | 15.0 (3.5, 2.7, 2.4, 2.2, 2.0)                                   | 13.4 (2.8)                                    | 31.1 (10.6)                                   |
| Completeness (%)                                     | 82.6 (54.8, 45.2, 34.0, 23.0)                         | 74.1 (62.5, 49.8, 35.7, 20.9, 3.7)                               | 100 (100)                                     | 99.6 (92.3)                                   |
| Redundancy                                           | 5.6 (2.6, 2.4, 2.2, 2.0)                              | 3.8 (2.1, 1.9, 1.7, 1.6, 1.4)                                    | 6.9 (6.7)                                     | 6.6 (4.4)                                     |
| <b>Refinement</b>                                    |                                                       |                                                                  |                                               |                                               |
| Resolution (Å)                                       | 30.21-2.30 (2.42-2.30)                                | 26.78-1.77 (1.84-1.77)                                           | 43.42-1.98 (2.05-1.98)                        | 35.84-2.22 (2.30-2.22)                        |
| No. reflections                                      | 18859                                                 | 35657                                                            | 34887                                         | 24496                                         |
| <i>R</i> <sub>work</sub> / <i>R</i> <sub>free</sub>  | 23.67/26.82 (33.20/36.54)                             | 19.06/23.71 (31.94/33.99)                                        | 16.75/20.39 (21.58/25.62)                     | 18.32/20.91 (21.04/25.21)                     |
| No. atoms                                            | 3340                                                  | 3690                                                             | 3659                                          | 3526                                          |
| Protein                                              | 3244                                                  | 3282                                                             | 3285                                          | 3258                                          |
| Water                                                | 96                                                    | 408                                                              | 299                                           | 267                                           |
| Ligand                                               |                                                       |                                                                  | 75                                            | 1                                             |
| B-factors (Å <sup>2</sup> )                          | 44.49                                                 | 36.46                                                            | 37.64                                         | 33.80                                         |
| Protein                                              | 44.76                                                 | 36.14                                                            | 37.17                                         | 33.52                                         |
| Water                                                | 35.28                                                 | 39.04                                                            | 40.48                                         | 37.26                                         |
| Ligand                                               |                                                       |                                                                  | 47.13                                         | 18.59                                         |
| R.m.s deviations                                     |                                                       |                                                                  |                                               |                                               |
| Bond lengths (Å)                                     | 0.003                                                 | 0.006                                                            | 0.005                                         | 0.005                                         |
| Bond angles (°)                                      | 0.64                                                  | 0.78                                                             | 0.77                                          | 0.80                                          |
| Ramachadran Favored %                                | 96.0                                                  | 97.0                                                             | 97.0                                          | 96.5                                          |
| Ramachadran Outliers %                               | 0.0                                                   | 0.0                                                              | 0.0                                           | 0.00                                          |
| MolProbity all-atoms clashscore                      | 2.0                                                   | 0.93                                                             | 1.81                                          | 2.96                                          |
| <b>PDB ID</b>                                        | 6B5P                                                  | 6B5R                                                             | 6B5S                                          | 6B5T                                          |

\* Statistics for the highest-resolution shell are shown in parentheses.
